# Supplementary material for: Advanced kinetic calculations with multi-path variational transition state theory for reactions between dimethylamine and nitrogen dioxide in atmospheric and combustion temperature ranges
Source: Royal Society of Chemistry journal article supplement (doi:10.1039/d3cp01336g), 2023-01-01
Supplement: d3cp01336g1.pdf [file d3cp01336g1.pdf]

## Supplementary Information for:

# Advanced kinetic calculations with multi-path variational transition state theory for reactions between dimethylamine and nitrogen dioxide in atmospheric and combustion temperature range

Yanlei Shang <sup>a,b,c,\*</sup>

<sup>a</sup> *Yibin University, Yibin, Sichuan, 644000, P. R. China*

<sup>b</sup> *Energy Research Institute, Qilu University of Technology (Shandong Academy of Sciences), Jinan, Shandong, 250014, P. R. China*

<sup>c</sup> *Key Laboratory of Advanced Technology of Materials, Ministry of Education, Southwest Jiaotong University, Chengdu, Sichuan, 610031, P. R. China*

Table S1. Forward and reverse activation energies ( $\Delta E_{\ddagger}^{\rightarrow}$  and  $\Delta E_{\ddagger}^{\leftarrow}$ , in kcal mol<sup>-1</sup>) and reaction energies ( $\Delta E$ , in kcal mol<sup>-1</sup>) at 0 K without ZPE corrections for H-abstraction reactions from DMA by NO<sub>2</sub> at the N-site, as calculated by various quantum chemical methods based on the lowest-energy-structures optimized by the BH&HLYP/cc-pVTZ method.

Table S2. Forward and reverse activation energies ( $\Delta E_{\ddagger}^{\rightarrow}$  and  $\Delta E_{\ddagger}^{\leftarrow}$ , in kcal mol<sup>-1</sup>) and reaction energies ( $\Delta E$ , in kcal mol<sup>-1</sup>) at 0 K without ZPE corrections for H-abstraction reactions from DMA by NO<sub>2</sub> at the C-site, as calculated by various quantum chemical methods based on the lowest-energy-structures optimized by the BH&HLYP/cc-pVTZ method.

Table S3. Mean unsigned deviations (MUD, in kcal mol<sup>-1</sup>) of various combinations from CCSD(T)-F12/jun-cc-pVTZ.

Table S4. Relative energies (in kcal mol<sup>-1</sup>) of the involved species for the reactions between DMA and NO<sub>2</sub> at the M08-HX/ma-TZVP level of theory.

Table S5. Optimized geometries and frequencies of involved species with the lowest energies for DMA + NO<sub>2</sub> reactions at the M08-HX/ma-TZVP level of theory. Multi-structural conformers are also shown with the energies relative to their ground-state structures. The T1 values of the involved species with the lowest-energy-structures for the H-abstraction reactions are also provided

Figure S1. Seven highest vibrational frequencies of general TSs along the reaction coordinate for (a) R1a and (b) R1c.

Table S1. Forward and reverse activation energies ( $\Delta E_{\ddagger}^{\#}$  and  $\Delta E_{\ddagger}^{\#}$ , in kcal mol<sup>-1</sup>) and reaction energies ( $\Delta E$ , in kcal mol<sup>-1</sup>) at 0 K without ZPE corrections for H-abstraction reactions from DMA by NO<sub>2</sub> at the N-site, as calculated by various quantum chemical methods based on the lowest-energy-structures optimized by the BH&HLYP/cc-pVTZ method.

| Method          | Basis set    | R1a                        |                            |            | R1b                        |                            |            | R1c                        |                            |            |
|-----------------|--------------|----------------------------|----------------------------|------------|----------------------------|----------------------------|------------|----------------------------|----------------------------|------------|
|                 |              | $\Delta E_{\ddagger}^{\#}$ | $\Delta E_{\ddagger}^{\#}$ | $\Delta E$ | $\Delta E_{\ddagger}^{\#}$ | $\Delta E_{\ddagger}^{\#}$ | $\Delta E$ | $\Delta E_{\ddagger}^{\#}$ | $\Delta E_{\ddagger}^{\#}$ | $\Delta E$ |
| BH&HLYP         | cc-pVTZ      | 21.9                       | 0.1                        | 21.8       | 13.4                       | 0.1                        | 13.3       | 20.7                       | 7.1                        | 13.6       |
|                 | MG3S         | 21.1                       | 0.2                        | 20.9       | 13.1                       | -0.5                       | 13.6       | 19.4                       | 6.0                        | 13.4       |
|                 | ma-TZVP      | 21.6                       | 0.4                        | 21.2       | 13.7                       | -0.2                       | 13.9       | 19.8                       | 6.0                        | 13.8       |
|                 | jun-cc-pVTZ  | 21.5                       | 0.6                        | 20.9       | 13.2                       | 0.0                        | 13.2       | 19.4                       | 6.4                        | 13.0       |
|                 | jul-cc-pVTZ  | 21.5                       | 0.5                        | 21.0       | 13.3                       | 0.1                        | 13.2       | 19.4                       | 6.4                        | 13.0       |
|                 | maug-cc-pVTZ | 21.6                       | 0.5                        | 21.1       | 13.3                       | 0.0                        | 13.3       | 19.5                       | 6.4                        | 13.1       |
|                 | aug-cc-pVTZ  | 21.5                       | 0.6                        | 20.9       | 13.2                       | 0.1                        | 13.1       | 19.3                       | 6.4                        | 12.9       |
| M06-2X          | cc-pVTZ      | 19.0                       | -5.7                       | 24.7       | 11.4                       | -4.3                       | 15.7       | 18.8                       | 2.7                        | 16.1       |
|                 | MG3S         | 18.8                       | -5.6                       | 24.4       | 11.7                       | -4.5                       | 16.2       | 18.5                       | 2.3                        | 16.2       |
|                 | ma-TZVP      | 19.6                       | -5.1                       | 24.7       | 12.5                       | -4.1                       | 16.6       | 19.0                       | 2.3                        | 16.7       |
|                 | jun-cc-pVTZ  | 18.9                       | -5.2                       | 24.1       | 11.4                       | -4.2                       | 15.6       | 18.1                       | 2.5                        | 15.6       |
|                 | jul-cc-pVTZ  | 19.0                       | -5.1                       | 24.1       | 11.4                       | -4.2                       | 15.6       | 18.0                       | 2.4                        | 15.6       |
|                 | maug-cc-pVTZ | 19.0                       | -5.3                       | 24.3       | 11.5                       | -4.2                       | 15.7       | 18.2                       | 2.5                        | 15.7       |
|                 | aug-cc-pVTZ  | 18.9                       | -5.2                       | 24.1       | 11.3                       | -4.2                       | 15.5       | 17.9                       | 2.4                        | 15.5       |
| M06-2X-D3       | cc-pVTZ      | 18.9                       | -5.9                       | 24.8       | 11.3                       | -4.4                       | 15.7       | 18.7                       | 2.6                        | 16.1       |
|                 | MG3S         | 18.7                       | -5.7                       | 24.4       | 11.5                       | -4.8                       | 16.3       | 18.3                       | 2.1                        | 16.2       |
|                 | ma-TZVP      | 19.5                       | -5.2                       | 24.7       | 12.4                       | -4.3                       | 16.7       | 18.9                       | 2.2                        | 16.7       |
|                 | jun-cc-pVTZ  | 18.8                       | -5.3                       | 24.1       | 11.3                       | -4.3                       | 15.6       | 17.9                       | 2.3                        | 15.6       |
|                 | jul-cc-pVTZ  | 18.8                       | -5.5                       | 24.4       | 11.3                       | -4.3                       | 15.6       | 17.9                       | 2.3                        | 15.6       |
|                 | maug-cc-pVTZ | 18.9                       | -5.4                       | 24.3       | 11.4                       | -4.3                       | 15.7       | 18.1                       | 2.4                        | 15.7       |
|                 | aug-cc-pVTZ  | 18.7                       | -5.4                       | 24.1       | 11.2                       | -4.3                       | 15.5       | 17.8                       | 2.3                        | 15.5       |
| M08-HX          | cc-pVTZ      | 20.5                       | -3.4                       | 23.9       | 12.4                       | -3.5                       | 15.9       | 19.5                       | 3.0                        | 16.5       |
|                 | MG3S         | 19.7                       | -3.5                       | 23.2       | 12.0                       | -4.3                       | 16.3       | 18.5                       | 2.1                        | 16.4       |
|                 | ma-TZVP      | 20.8                       | -3.0                       | 23.8       | 13.5                       | -3.4                       | 16.9       | 19.7                       | 2.8                        | 16.9       |
|                 | jun-cc-pVTZ  | 20.4                       | -3.1                       | 23.5       | 12.6                       | -3.4                       | 16.0       | 18.8                       | 2.7                        | 16.1       |
|                 | jul-cc-pVTZ  | 20.4                       | -3.1                       | 23.5       | 12.6                       | -3.4                       | 16.0       | 18.8                       | 2.7                        | 16.1       |
|                 | maug-cc-pVTZ | 20.5                       | -3.1                       | 23.6       | 12.7                       | -3.4                       | 16.1       | 19.0                       | 2.9                        | 16.1       |
|                 | aug-cc-pVTZ  | 20.3                       | -3.1                       | 23.4       | 12.5                       | -3.5                       | 16.0       | 18.7                       | 2.7                        | 16.0       |
| $\omega$ B97X-D | cc-pVTZ      | 18.1                       | -6.8                       | 24.9       | 11.6                       | -7.0                       | 18.6       | 18.1                       | -0.6                       | 18.7       |
|                 | MG3S         | 17.5                       | -6.5                       | 24.0       | 11.2                       | -7.5                       | 18.7       | 17.2                       | -1.1                       | 18.3       |
|                 | ma-TZVP      | 18.4                       | -6.2                       | 24.6       | 12.5                       | -6.9                       | 19.4       | 18.2                       | -0.8                       | 19.0       |
|                 | jun-cc-pVTZ  | 18.2                       | -6.2                       | 24.4       | 11.9                       | -6.6                       | 18.5       | 17.7                       | -0.5                       | 18.2       |
|                 | jul-cc-pVTZ  | 18.2                       | -6.2                       | 24.4       | 11.9                       | -6.6                       | 18.5       | 17.6                       | -0.6                       | 18.2       |
|                 | maug-cc-pVTZ | 18.2                       | -6.3                       | 24.5       | 11.8                       | -6.7                       | 18.5       | 17.6                       | -0.5                       | 18.1       |
|                 | aug-cc-pVTZ  | 18.1                       | -6.2                       | 24.3       | 11.8                       | -6.7                       | 18.5       | 17.6                       | -0.5                       | 18.1       |
| B3LYP           | cc-pVTZ      | 15.2                       | -8.5                       | 23.7       | 9.0                        | -8.7                       | 17.7       | 14.0                       | -3.7                       | 17.7       |
|                 | MG3S         | 15.1                       | -7.9                       | 23.0       | 9.4                        | -8.6                       | 18.0       | 13.8                       | -3.6                       | 17.4       |
|                 | ma-TZVP      | 15.5                       | -7.8                       | 23.3       | 10.0                       | -8.5                       | 18.5       | 14.2                       | -3.7                       | 17.9       |
|                 | jun-cc-pVTZ  | 15.5                       | -7.6                       | 23.1       | 9.6                        | -8.0                       | 17.6       | 13.9                       | -3.2                       | 17.1       |
|                 | jul-cc-pVTZ  | 15.5                       | -7.6                       | 23.1       | 9.6                        | -8.0                       | 17.6       | 13.8                       | -3.2                       | 17.0       |
|                 | maug-cc-pVTZ | 15.5                       | -7.7                       | 23.2       | 9.7                        | -8.1                       | 17.8       | 13.9                       | -3.2                       | 17.1       |
|                 | aug-cc-pVTZ  | 15.4                       | -7.6                       | 23.0       | 9.5                        | -8.1                       | 17.6       | 13.8                       | -3.2                       | 17.0       |

|                   |                                     |      |       |      |       |      |       |      |      |      |
|-------------------|-------------------------------------|------|-------|------|-------|------|-------|------|------|------|
| PW6B95            | cc-pVTZ                             | 17.7 | -7.1  | 24.8 | 11.1  | -7.5 | 18.6  | 16.5 | -2.4 | 18.9 |
|                   | MG3S                                | 17.3 | -6.8  | 24.1 | 11.2  | -7.6 | 18.8  | 16.1 | -2.4 | 18.5 |
|                   | ma-TZVP                             | 17.9 | -6.5  | 24.4 | 11.9  | -7.4 | 19.3  | 16.5 | -2.5 | 19.0 |
|                   | jun-cc-pVTZ                         | 17.8 | -6.4  | 24.2 | 11.5  | -7.0 | 18.5  | 16.2 | -2.0 | 18.2 |
|                   | jul-cc-pVTZ                         | 17.8 | -6.4  | 24.2 | 11.5  | -7.0 | 18.5  | 16.1 | -2.1 | 18.2 |
|                   | maug-cc-pVTZ                        | 17.8 | -6.5  | 24.3 | 11.6  | -7.0 | 18.6  | 16.3 | -2.0 | 18.3 |
|                   | aug-cc-pVTZ                         | 17.7 | -6.5  | 24.2 | 11.4  | -7.0 | 18.4  | 16.1 | -2.0 | 18.1 |
| M05-2X            | cc-pVTZ                             | 19.6 | -4.0  | 23.6 | 11.1  | -4.9 | 16.0  | 18.7 | 2.3  | 16.4 |
|                   | MG3S                                | 19.3 | -3.9  | 23.2 | 11.3  | -5.2 | 16.5  | 18.2 | 1.7  | 16.5 |
|                   | ma-TZVP                             | 19.9 | -3.8  | 23.7 | 12.1  | -5.0 | 17.1  | 18.7 | 1.6  | 17.1 |
|                   | jun-cc-pVTZ                         | 19.4 | -3.5  | 22.9 | 11.0  | -4.9 | 15.9  | 17.8 | 1.9  | 15.9 |
|                   | jul-cc-pVTZ                         | 19.4 | -3.6  | 23.0 | 11.1  | -4.8 | 15.9  | 17.7 | 1.8  | 15.9 |
|                   | maug-cc-pVTZ                        | 19.5 | -3.6  | 23.1 | 11.2  | -4.8 | 16.0  | 17.9 | 1.9  | 16.0 |
|                   | aug-cc-pVTZ                         | 19.3 | -3.6  | 22.9 | 11.0  | -4.9 | 15.9  | 17.6 | 1.8  | 15.8 |
| MN15-L            | cc-pVTZ                             | 14.6 | -8.3  | 22.9 | 8.0   | -6.6 | 14.6  | 14.2 | -1.1 | 15.3 |
|                   | MG3S                                | 14.5 | -7.5  | 22.0 | 8.3   | -6.4 | 14.7  | 14.2 | -0.6 | 14.8 |
|                   | ma-TZVP                             | 15.2 | -7.5  | 22.7 | 8.8   | -6.2 | 15.0  | 14.4 | -0.8 | 15.2 |
|                   | jun-cc-pVTZ                         | 14.8 | -7.6  | 22.4 | 8.4   | -6.2 | 14.6  | 14.0 | -0.7 | 14.7 |
|                   | jul-cc-pVTZ                         | 14.6 | -7.8  | 22.4 | 8.3   | -6.3 | 14.6  | 13.8 | -0.9 | 14.7 |
|                   | maug-cc-pVTZ                        | 14.9 | -7.6  | 22.5 | 8.6   | -6.1 | 14.7  | 14.1 | -0.7 | 14.8 |
|                   | aug-cc-pVTZ                         | 14.5 | -7.8  | 22.3 | 8.1   | -6.5 | 14.6  | 13.7 | -1.0 | 14.7 |
| CCSD(T)-F12       | cc-pVDZ-F12                         | 21.5 | -3.1  | 24.6 | 14.1  | -3.0 | 17.1  | 21.3 | 4.6  | 16.7 |
|                   | jun-cc-pVTZ                         | 21.1 | -3.3  | 24.4 | 13.6  | -3.4 | 17.0  | 20.9 | 4.2  | 16.7 |
|                   | DLPNO-CCSD(T)/CBS(T-Q) <sup>a</sup> | 25.5 | 1.3   | 24.2 | 16.7  | 0.0  | 16.7  | 23.6 | 7.3  | 16.3 |
| T1 values for TSs |                                     |      | 0.039 |      | 0.031 |      | 0.030 |      |      |      |

<sup>a</sup>: derived with the two-point exponential scheme  $[E(x) = E_{\text{CBS}} + \frac{B}{(x+1)^4}]$ .

Table S2. Forward and reverse activation energies ( $\Delta E_{\ddagger}^{\#}$  and  $\Delta E_{\ddagger}^{\#}$ , in kcal mol<sup>-1</sup>) and reaction energies ( $\Delta E$ , in kcal mol<sup>-1</sup>) at 0 K without ZPE corrections for H-abstraction reactions from DMA by NO<sub>2</sub> at the C-site, as calculated by various quantum chemical methods based on the lowest-energy-structures optimized by the BH&HLYP/cc-pVTZ method.

| Method          | Basis set    | R2a                        |                            |            | R2b                        |                            |            | R2c                        |                            |            |
|-----------------|--------------|----------------------------|----------------------------|------------|----------------------------|----------------------------|------------|----------------------------|----------------------------|------------|
|                 |              | $\Delta E_{\ddagger}^{\#}$ | $\Delta E_{\ddagger}^{\#}$ | $\Delta E$ | $\Delta E_{\ddagger}^{\#}$ | $\Delta E_{\ddagger}^{\#}$ | $\Delta E$ | $\Delta E_{\ddagger}^{\#}$ | $\Delta E_{\ddagger}^{\#}$ | $\Delta E$ |
| BH&HLYP         | cc-pVTZ      | 19.9                       | -1.6                       | 21.5       | 18.2                       | 5.0                        | 13.2       | 23.6                       | 10.1                       | 13.5       |
|                 | MG3S         | 19.2                       | -1.3                       | 20.5       | 18.2                       | 5.1                        | 13.1       | 23.1                       | 10.1                       | 13.0       |
|                 | ma-TZVP      | 19.8                       | -1.2                       | 21.0       | 18.8                       | 5.0                        | 13.8       | 23.5                       | 9.8                        | 13.7       |
|                 | jun-cc-pVTZ  | 19.6                       | -1.0                       | 20.6       | 18.4                       | 5.6                        | 12.8       | 23.1                       | 10.5                       | 12.6       |
|                 | jul-cc-pVTZ  | 19.6                       | -1.0                       | 20.6       | 18.4                       | 5.6                        | 12.8       | 23.1                       | 10.5                       | 12.6       |
|                 | maug-cc-pVTZ | 19.6                       | -1.1                       | 20.7       | 18.4                       | 5.5                        | 12.9       | 23.1                       | 10.4                       | 12.7       |
|                 | aug-cc-pVTZ  | 19.5                       | -1.0                       | 20.5       | 18.3                       | 5.6                        | 12.7       | 23.0                       | 10.5                       | 12.5       |
| M06-2X          | cc-pVTZ      | 15.8                       | -6.7                       | 22.5       | 13.6                       | 0.2                        | 13.4       | 19.0                       | 5.1                        | 13.9       |
|                 | MG3S         | 15.3                       | -6.4                       | 21.7       | 14.0                       | 0.4                        | 13.6       | 18.7                       | 5.1                        | 13.6       |
|                 | ma-TZVP      | 16.0                       | -6.2                       | 22.2       | 14.7                       | 0.5                        | 14.2       | 19.3                       | 5.1                        | 14.2       |
|                 | jun-cc-pVTZ  | 15.4                       | -6.3                       | 21.7       | 13.9                       | 0.7                        | 13.2       | 18.4                       | 5.2                        | 13.2       |
|                 | jul-cc-pVTZ  | 15.4                       | -6.3                       | 21.7       | 13.9                       | 0.8                        | 13.1       | 18.4                       | 5.3                        | 13.1       |
|                 | maug-cc-pVTZ | 15.5                       | -6.3                       | 21.8       | 13.8                       | 0.6                        | 13.2       | 18.5                       | 5.4                        | 13.1       |
|                 | aug-cc-pVTZ  | 15.3                       | -6.3                       | 21.6       | 13.8                       | 0.8                        | 13.0       | 18.3                       | 5.3                        | 13.0       |
| M06-2X-D3       | cc-pVTZ      | 15.6                       | -6.9                       | 22.5       | 13.5                       | 0.1                        | 13.4       | 18.8                       | 4.9                        | 13.9       |
|                 | MG3S         | 15.1                       | -6.6                       | 21.7       | 13.8                       | 0.2                        | 13.6       | 18.6                       | 5.0                        | 13.6       |
|                 | ma-TZVP      | 15.9                       | -6.3                       | 22.2       | 14.6                       | 0.4                        | 14.2       | 19.2                       | 5.0                        | 14.2       |
|                 | jun-cc-pVTZ  | 15.3                       | -6.4                       | 21.7       | 13.7                       | 0.5                        | 13.2       | 18.3                       | 5.1                        | 13.2       |
|                 | jul-cc-pVTZ  | 15.3                       | -6.6                       | 21.9       | 13.7                       | 0.6                        | 13.1       | 18.3                       | 5.2                        | 13.1       |
|                 | maug-cc-pVTZ | 15.4                       | -6.4                       | 21.8       | 13.7                       | 0.5                        | 13.2       | 18.4                       | 5.3                        | 13.1       |
|                 | aug-cc-pVTZ  | 15.2                       | -6.4                       | 21.6       | 13.6                       | 0.6                        | 13.0       | 18.2                       | 5.2                        | 13.0       |
| M08-HX          | cc-pVTZ      | 15.9                       | -5.1                       | 21.0       | 14.6                       | 1.6                        | 13.0       | 19.5                       | 6.0                        | 13.5       |
|                 | MG3S         | 14.8                       | -4.8                       | 19.6       | 14.3                       | 1.6                        | 12.7       | 18.6                       | 5.8                        | 12.8       |
|                 | ma-TZVP      | 16.1                       | -4.3                       | 20.4       | 15.7                       | 2.2                        | 13.5       | 19.9                       | 6.3                        | 13.6       |
|                 | jun-cc-pVTZ  | 15.7                       | -4.4                       | 20.1       | 14.9                       | 2.3                        | 12.6       | 19.0                       | 6.3                        | 12.7       |
|                 | jul-cc-pVTZ  | 15.7                       | -4.5                       | 20.2       | 15.0                       | 2.4                        | 12.6       | 19.0                       | 6.3                        | 12.7       |
|                 | maug-cc-pVTZ | 15.8                       | -4.4                       | 20.2       | 14.9                       | 2.2                        | 12.7       | 19.1                       | 6.4                        | 12.7       |
|                 | aug-cc-pVTZ  | 15.6                       | -4.4                       | 20.0       | 14.9                       | 2.3                        | 12.6       | 18.9                       | 6.3                        | 12.6       |
| $\omega$ B97X-D | cc-pVTZ      | 15.5                       | -7.6                       | 23.1       | 14.3                       | -2.5                       | 16.8       | 19.3                       | 2.4                        | 16.9       |
|                 | MG3S         | 14.5                       | -7.3                       | 21.8       | 14.0                       | -2.5                       | 16.5       | 18.4                       | 2.3                        | 16.1       |
|                 | ma-TZVP      | 15.6                       | -7.1                       | 22.7       | 15.2                       | -2.3                       | 17.5       | 19.4                       | 2.3                        | 17.1       |
|                 | jun-cc-pVTZ  | 15.3                       | -7.0                       | 22.3       | 14.7                       | -1.8                       | 16.5       | 18.9                       | 2.7                        | 16.2       |
|                 | jul-cc-pVTZ  | 15.3                       | -7.0                       | 22.3       | 14.7                       | -1.8                       | 16.5       | 18.9                       | 2.8                        | 16.1       |
|                 | maug-cc-pVTZ | 15.4                       | -7.0                       | 22.4       | 14.7                       | -1.9                       | 16.6       | 19.0                       | 2.8                        | 16.2       |
|                 | aug-cc-pVTZ  | 15.3                       | -6.9                       | 22.2       | 14.7                       | -1.7                       | 16.4       | 18.8                       | 2.8                        | 16.0       |
| B3LYP           | cc-pVTZ      | 14.6                       | -7.5                       | 22.1       | 11.8                       | -4.2                       | 16.0       | 17.1                       | 1.0                        | 16.1       |
|                 | MG3S         | 14.1                       | -6.9                       | 21.0       | 12.1                       | -3.8                       | 15.9       | 16.8                       | 1.4                        | 15.4       |
|                 | ma-TZVP      | 14.6                       | -6.9                       | 21.5       | 12.6                       | -4.1                       | 16.7       | 17.2                       | 1.1                        | 16.1       |
|                 | jun-cc-pVTZ  | 14.5                       | -6.6                       | 21.1       | 12.3                       | -3.4                       | 15.7       | 16.8                       | 1.7                        | 15.1       |
|                 | jul-cc-pVTZ  | 14.6                       | -6.5                       | 21.1       | 12.3                       | -3.3                       | 15.6       | 16.8                       | 1.8                        | 15.0       |
|                 | maug-cc-pVTZ | 14.6                       | -6.6                       | 21.2       | 12.3                       | -3.5                       | 15.8       | 16.9                       | 1.8                        | 15.1       |
|                 | aug-cc-pVTZ  | 14.5                       | -6.5                       | 21.0       | 12.2                       | -3.4                       | 15.6       | 16.7                       | 1.7                        | 15.0       |

|                   |                                     |      |       |      |       |      |       |      |      |      |
|-------------------|-------------------------------------|------|-------|------|-------|------|-------|------|------|------|
| PW6B95            | cc-pVTZ                             | 15.8 | -7.3  | 23.1 | 13.6  | -3.2 | 16.8  | 18.6 | 1.5  | 17.1 |
|                   | MG3S                                | 15.1 | -6.8  | 21.9 | 13.7  | -3.0 | 16.7  | 18.2 | 1.8  | 16.4 |
|                   | ma-TZVP                             | 15.8 | -6.7  | 22.5 | 14.4  | -3.0 | 17.4  | 18.7 | 1.6  | 17.1 |
|                   | jun-cc-pVTZ                         | 15.6 | -6.5  | 22.1 | 14.0  | -2.4 | 16.4  | 18.3 | 2.2  | 16.1 |
|                   | jul-cc-pVTZ                         | 15.6 | -6.5  | 22.1 | 14.0  | -2.4 | 16.4  | 18.3 | 2.3  | 16.0 |
|                   | maug-cc-pVTZ                        | 15.7 | -6.5  | 22.2 | 14.0  | -2.5 | 16.5  | 18.3 | 2.1  | 16.2 |
|                   | aug-cc-pVTZ                         | 15.5 | -6.5  | 22.0 | 13.9  | -2.4 | 16.3  | 18.2 | 2.2  | 16.0 |
| M05-2X            | cc-pVTZ                             | 15.3 | -5.9  | 21.2 | 13.8  | 0.1  | 13.7  | 19.4 | 5.3  | 14.1 |
|                   | MG3S                                | 14.8 | -5.7  | 20.5 | 14.1  | 0.3  | 13.8  | 19.1 | 5.3  | 13.8 |
|                   | ma-TZVP                             | 15.5 | -5.7  | 21.2 | 14.9  | 0.3  | 14.6  | 19.8 | 5.2  | 14.6 |
|                   | jun-cc-pVTZ                         | 15.0 | -5.5  | 20.5 | 14.0  | 0.6  | 13.4  | 18.8 | 5.4  | 13.4 |
|                   | jul-cc-pVTZ                         | 15.0 | -5.4  | 20.4 | 14.0  | 0.6  | 13.4  | 18.7 | 5.4  | 13.3 |
|                   | maug-cc-pVTZ                        | 15.1 | -5.5  | 20.6 | 14.0  | 0.5  | 13.5  | 18.9 | 5.5  | 13.4 |
|                   | aug-cc-pVTZ                         | 14.9 | -5.4  | 20.3 | 13.9  | 0.6  | 13.3  | 18.6 | 5.3  | 13.3 |
| MN15-L            | cc-pVTZ                             | 14.9 | -9.4  | 24.3 | 11.4  | -4.6 | 16.0  | 16.6 | -0.1 | 16.7 |
|                   | MG3S                                | 14.2 | -8.7  | 22.9 | 11.6  | -4.0 | 15.6  | 16.4 | 0.7  | 15.7 |
|                   | ma-TZVP                             | 15.6 | -8.5  | 24.1 | 12.5  | -4.0 | 16.5  | 17.0 | 0.3  | 16.7 |
|                   | jun-cc-pVTZ                         | 14.6 | -8.5  | 23.1 | 11.8  | -3.5 | 15.3  | 16.3 | 0.7  | 15.4 |
|                   | jul-cc-pVTZ                         | 14.5 | -8.7  | 23.2 | 11.7  | -3.7 | 15.4  | 16.3 | 0.8  | 15.5 |
|                   | maug-cc-pVTZ                        | 14.7 | -8.5  | 23.2 | 11.8  | -3.7 | 15.5  | 16.4 | 0.9  | 15.5 |
|                   | aug-cc-pVTZ                         | 14.3 | -8.7  | 23.0 | 11.6  | -3.7 | 15.3  | 16.1 | 0.7  | 15.4 |
| CCSD(T)-F12       | cc-pVDZ-F12                         | 18.6 | -4.1  | 22.7 | 17.6  | 2.4  | 15.2  | 22.3 | 7.5  | 14.8 |
|                   | jun-cc-pVTZ                         | 18.4 | -3.9  | 22.3 | 17.6  | 2.7  | 14.9  | 23.0 | 8.5  | 14.5 |
|                   | DLPNO-CCSD(T)/CBS(T-Q) <sup>a</sup> | 19.9 | -1.8  | 21.7 | 19.5  | 5.3  | 14.2  | 26.4 | 12.5 | 13.9 |
| T1 values for TSs |                                     |      | 0.020 |      | 0.027 |      | 0.044 |      |      |      |

<sup>a</sup>: derived with the two-point exponential scheme  $[E(x) = E_{\text{CBS}} + \frac{B}{(x+1)^4}]$ .

Table S3. Mean unsigned deviations (MUD, in kcal mol<sup>-1</sup>) of various combinations from CCSD(T)-F12/jun-cc-pVTZ.

| MUD                                | BH&HLYP   | M06-2X    | M06-2X-D3 | M08-HX           | $\omega$ B97X-D | B3LYP     | PW6B95    | M05-2X    | MN15-L    |
|------------------------------------|-----------|-----------|-----------|------------------|-----------------|-----------|-----------|-----------|-----------|
| cc-pVTZ                            | 1.8 (3.8) | 1.9 (4.1) | 2.0 (4.2) | 1.4 (3.5)        | 3.0 (6.1)       | 4.1 (7.9) | 3.4 (7.0) | 1.9 (3.8) | 4.5 (8.6) |
| MG3S                               | 1.9 (3.5) | 2.0 (4.3) | 2.0 (4.4) | 1.8 (4.4)        | 3.1 (6.2)       | 4.1 (7.8) | 3.4 (6.7) | 2.0 (4.0) | 4.2 (7.9) |
| ma-TZVP                            | 1.8 (3.8) | 1.5 (3.7) | 1.6 (3.8) | <b>1.1 (3.1)</b> | 2.9 (6.2)       | 4.1 (8.0) | 3.3 (6.9) | 1.6 (3.4) | 4.1 (8.2) |
| jun-cc-pVTZ                        | 2.1 (3.9) | 2.1 (4.6) | 2.1 (4.7) | 1.5 (4.1)        | 2.7 (5.7)       | 3.8 (7.4) | 3.0 (6.3) | 2.1 (4.3) | 4.1 (7.7) |
| jul-cc-pVTZ                        | 2.1 (3.9) | 2.1 (4.6) | 2.1 (4.8) | 1.5 (4.0)        | 2.7 (5.7)       | 3.8 (7.4) | 3.0 (6.3) | 2.1 (4.3) | 4.2 (7.7) |
| maug-cc-pVTZ                       | 2.1 (3.8) | 2.0 (4.6) | 2.1 (4.7) | 1.4 (3.9)        | 2.7 (5.7)       | 3.8 (7.4) | 3.0 (6.3) | 2.0 (4.2) | 4.1 (7.6) |
| aug-cc-pVTZ                        | 2.2 (3.9) | 2.1 (4.7) | 2.2 (4.9) | 1.6 (4.2)        | 2.7 (5.7)       | 3.8 (7.4) | 3.1 (6.3) | 2.1 (4.4) | 4.3 (7.8) |
| CCSD(T)-F12/cc-pVDZ-F12: 0.3 (1.0) |           |           |           |                  |                 |           |           |           |           |
| DLPNO-CCSD(T)/CBS(T-Q): 2.4 (4.6)  |           |           |           |                  |                 |           |           |           |           |

Values in parentheses are the maximum deviations. Single-point energy calculations are carried out based on the ground-state structures optimized by BH&HLYP/cc-pVTZ.

Table S4. Relative energies (in kcal mol<sup>-1</sup>) of the involved species for the reactions between DMA and NO<sub>2</sub> at the M08-HX/ma-TZVP level of theory.

| Reactions | Species                                                | Relative energy | Literature data | BSSE | Reactions | Species                                                | Relative energy |
|-----------|--------------------------------------------------------|-----------------|-----------------|------|-----------|--------------------------------------------------------|-----------------|
| Reactants | DMA + NO <sub>2</sub>                                  | 0.0             |                 |      | Reactants | DMA + NO <sub>2</sub>                                  | 0.0             |
| R1a       | RC1a                                                   | -0.8            |                 | 0.11 | R3a       | RC3a                                                   | -0.4            |
|           | TS1a                                                   | 17.7            |                 |      |           | TS3a                                                   | 53.6            |
|           | PC1a                                                   | 12.4            |                 |      |           | PC3a                                                   | 16.9            |
|           | CH <sub>3</sub> NCH <sub>3</sub> + HNO <sub>2</sub>    | 22.5            |                 |      |           | CH <sub>3</sub> NH + CH <sub>3</sub> NO <sub>2</sub>   | 19.7            |
| R1b       | RC1b                                                   | -3.0            |                 | 0.24 | R3b       | RC3b (- RC3a)                                          | -0.4            |
|           | TS1b                                                   | 10.7            | <u>10.7</u>     |      |           | TS3b                                                   | 57.2            |
|           | PC1b                                                   | 5.3             | <u>6.9</u>      |      |           | PC3b                                                   | 19.9            |
|           | CH <sub>3</sub> NCH <sub>3</sub> + <i>cis</i> -HONO    | 14.8            | <u>16.1</u>     |      |           | CH <sub>3</sub> NH + <i>cis</i> -CH <sub>3</sub> ONO   | 22.5            |
| R1c       | RC1c (- RC1b)*                                         | -3.0            |                 |      | R3c       | RC3c (- RC3a)                                          |                 |
|           | TS1c                                                   | 17.4            |                 |      |           | TS3c                                                   | 64.7            |
|           | PC1c                                                   | 5.0             |                 |      |           | PC3c                                                   | 21.7            |
|           | CH <sub>3</sub> NCH <sub>3</sub> + <i>trans</i> -HONO  | 14.9            |                 |      |           | CH <sub>3</sub> NH + <i>trans</i> -CH <sub>3</sub> ONO | 23.7            |
| R2a       | RC2a (- RC1a)                                          | -0.8            |                 |      | R4a       | RC4a (- RC1b)                                          | -3.0            |
|           | TS2a                                                   | 13.8            |                 |      |           | TS4a                                                   | 49.5            |
|           | PC2a                                                   | 11.8            |                 |      |           | PC4a                                                   | 25.4            |
|           | CH <sub>3</sub> NHCH <sub>2</sub> + HNO <sub>2</sub>   | 10.1            |                 |      |           | CH <sub>3</sub> + CH <sub>3</sub> NHNO <sub>2</sub>    | 27.2            |
| R2b       | RC2b                                                   | -0.6            |                 | 0.12 | R4b       | RC4b (- RC1b)                                          | -3.0            |
|           | TS2b                                                   | 13.2            |                 |      |           | TS4b                                                   | 70.9            |
|           | PC2b                                                   | 5.6             |                 |      |           | PC4b                                                   | 51.0            |
|           | CH <sub>3</sub> NHCH <sub>2</sub> + <i>cis</i> -HONO   | 14.4            |                 |      |           | CH <sub>3</sub> + <i>cis</i> -CH <sub>3</sub> NHONO    | 51.9            |
| R2c       | RC2c (- RC1a)                                          | -0.8            |                 |      | R4c       | RC4c (- RC1b)                                          | -3.0            |
|           | TS2c                                                   | 17.8            |                 |      |           | TS4c                                                   | 73.6            |
|           | PC2c                                                   | 5.3             |                 |      |           | PC4c                                                   | 50.8            |
|           | CH <sub>3</sub> NHCH <sub>2</sub> + <i>trans</i> -HONO | 14.5            |                 |      |           | CH <sub>3</sub> + <i>trans</i> -CH <sub>3</sub> NHONO  | 51.6            |
|           |                                                        |                 |                 |      | R5        | RC5 (-RC1b)                                            | -3.0            |
|           |                                                        |                 |                 |      |           | TS5                                                    | 38.6            |
|           |                                                        |                 |                 |      |           | Product-5                                              | 10.6            |

\*: The symbol means that RCs have the same structures.

Table S5. Optimized geometries and frequencies of involved species with the lowest energies for DMA + NO<sub>2</sub> reactions at the M08-HX/ma-TZVP level of theory. Multi-structural conformers are also shown with the energies relative to their ground-state structures. The T1 values of the involved species with the lowest-energy-structures for the H-abstraction reactions are also provided

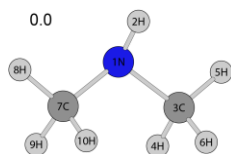

| Geometry – Dimethylamine – C <sub>s</sub> |           |           |           | Frequency (cm <sup>-1</sup> ) |         |         |         |         |         |
|-------------------------------------------|-----------|-----------|-----------|-------------------------------|---------|---------|---------|---------|---------|
| N                                         | 0.031312  | 0.591082  | 0.000000  | 233.81                        | 270.86  | 385.85  | 769.52  | 966.23  | 1031.20 |
| H                                         | -0.763860 | 1.216921  | 0.000000  | 1097.24                       | 1186.45 | 1201.06 | 1266.19 | 1428.58 | 1456.54 |
| C                                         | 0.026340  | -0.218306 | 1.201868  | 1464.20                       | 1475.98 | 1483.69 | 1504.92 | 1506.24 | 2951.88 |
| H                                         | 0.962743  | -0.786363 | 1.257905  | 2953.11                       | 3059.12 | 3061.99 | 3116.99 | 3117.07 | 3572.07 |
| H                                         | -0.027784 | 0.421469  | 2.087744  | T1 value: 0.009               |         |         |         |         |         |
| H                                         | -0.805220 | -0.945591 | 1.242653  |                               |         |         |         |         |         |
| C                                         | 0.026340  | -0.218306 | -1.201868 |                               |         |         |         |         |         |
| H                                         | -0.027784 | 0.421469  | -2.087744 |                               |         |         |         |         |         |
| H                                         | 0.962743  | -0.786363 | -1.257905 |                               |         |         |         |         |         |
| H                                         | -0.805220 | -0.945591 | -1.242653 |                               |         |         |         |         |         |

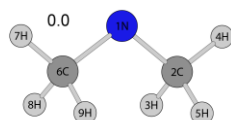

| Geometry – CH <sub>3</sub> NCH <sub>3</sub> – C <sub>2v</sub> |           |           |           | Frequency (cm <sup>-1</sup> ) |         |         |                 |         |         |
|---------------------------------------------------------------|-----------|-----------|-----------|-------------------------------|---------|---------|-----------------|---------|---------|
| N                                                             | 0.000066  | 0.641663  | 0.000000  | 102.96                        | 164.18  | 436.44  | 936.31          | 949.03  | 1010.87 |
| C                                                             | 0.000009  | -0.165643 | 1.182709  | 1028.22                       | 1206.19 | 1232.09 | 1385.69         | 1405.47 | 1449.33 |
| H                                                             | 0.883372  | -0.826696 | 1.207852  | 1459.72                       | 1477.07 | 1479.58 | 2955.63         | 2962.83 | 3011.05 |
| H                                                             | 0.000274  | 0.458901  | 2.079675  | 3015.42                       | 3117.42 | 3118.17 | T1 value: 0.014 |         |         |
| H                                                             | -0.883756 | -0.826156 | 1.208050  |                               |         |         |                 |         |         |
| C                                                             | 0.000009  | -0.165643 | -1.182709 |                               |         |         |                 |         |         |
| H                                                             | 0.000274  | 0.458901  | -2.079675 |                               |         |         |                 |         |         |
| H                                                             | 0.883372  | -0.826696 | -1.207852 |                               |         |         |                 |         |         |
| H                                                             | -0.883756 | -0.826156 | -1.208050 |                               |         |         |                 |         |         |

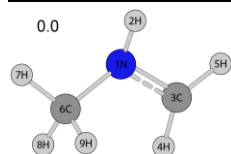

| Geometry – CH <sub>3</sub> NHCH <sub>2</sub> – C <sub>1</sub> |           |           |           | Frequency (cm <sup>-1</sup> ) |         |         |                 |         |         |
|---------------------------------------------------------------|-----------|-----------|-----------|-------------------------------|---------|---------|-----------------|---------|---------|
| N                                                             | 0.092419  | 0.479615  | -0.126718 | 195.31                        | 325.64  | 389.93  | 574.30          | 624.27  | 986.05  |
| H                                                             | 0.117274  | 1.426561  | 0.217539  | 1039.37                       | 1135.08 | 1254.70 | 1314.67         | 1436.16 | 1464.70 |
| C                                                             | 1.243815  | -0.246856 | 0.072780  | 1472.33                       | 1491.09 | 1540.57 | 2989.83         | 3075.66 | 3128.97 |
| H                                                             | 1.218676  | -1.291046 | -0.216039 | 3171.63                       | 3290.01 | 3634.09 | T1 value: 0.016 |         |         |
| H                                                             | 2.184296  | 0.288091  | 0.054187  |                               |         |         |                 |         |         |
| C                                                             | -1.179396 | -0.185722 | 0.032116  |                               |         |         |                 |         |         |
| H                                                             | -1.989840 | 0.475733  | -0.285365 |                               |         |         |                 |         |         |
| H                                                             | -1.198118 | -1.074371 | -0.608451 |                               |         |         |                 |         |         |
| H                                                             | -1.367570 | -0.510489 | 1.067384  |                               |         |         |                 |         |         |

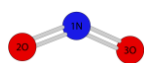

| Geometry – NO <sub>2</sub> – C <sub>2v</sub> |           |           |           | Frequency (cm <sup>-1</sup> ) |         |         |
|----------------------------------------------|-----------|-----------|-----------|-------------------------------|---------|---------|
| N                                            | 0.000000  | -0.000000 | 0.311667  | 789.59                        | 1479.00 | 1797.08 |
| O                                            | 0.000000  | 1.087744  | -0.136446 | T1 value: 0.023               |         |         |
| O                                            | -0.000000 | -1.087744 | -0.136446 |                               |         |         |

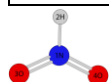

| Geometry – HNO <sub>2</sub> – C <sub>2v</sub> |           |           |           | Frequency (cm <sup>-1</sup> ) |         |         |         |         |         |
|-----------------------------------------------|-----------|-----------|-----------|-------------------------------|---------|---------|---------|---------|---------|
| N                                             | -0.000020 | 0.301890  | 0.000000  | 819.14                        | 1106.73 | 1479.01 | 1531.67 | 1737.63 | 3216.59 |
| H                                             | 0.000192  | 1.346071  | 0.000000  | T1 value: 0.019               |         |         |         |         |         |
| O                                             | -0.000005 | -0.221939 | 1.080957  |                               |         |         |         |         |         |
| O                                             | -0.000005 | -0.221939 | -1.080957 |                               |         |         |         |         |         |

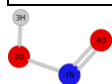

| Geometry – <i>cis</i> -HONO – C <sub>s</sub> |           |           |           | Frequency (cm <sup>-1</sup> ) |        |        |         |         |         |
|----------------------------------------------|-----------|-----------|-----------|-------------------------------|--------|--------|---------|---------|---------|
| N                                            | -0.157152 | -0.515722 | 0.000175  | 697.61                        | 708.88 | 991.55 | 1384.38 | 1787.71 | 3705.25 |
| O                                            | 1.063105  | 0.066540  | -0.000206 | T1 value: 0.020               |        |        |         |         |         |
| H                                            | 0.916487  | 1.029112  | -0.000420 |                               |        |        |         |         |         |
| O                                            | -1.042265 | 0.251447  | -0.000120 |                               |        |        |         |         |         |

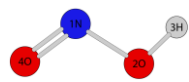

| Geometry – <i>trans</i> -HONO – C <sub>s</sub> |           |           |           | Frequency (cm <sup>-1</sup> ) |        |        |         |         |         |
|------------------------------------------------|-----------|-----------|-----------|-------------------------------|--------|--------|---------|---------|---------|
| N                                              | 0.160174  | 0.476065  | 0.000001  | 578.0839                      | 708.36 | 916.12 | 1346.99 | 1847.60 | 3873.25 |
| O                                              | -1.010251 | -0.254285 | -0.000001 | T1 value:                     |        |        |         |         |         |
| H                                              | -1.703937 | 0.414566  | 0.000006  |                               |        |        |         |         |         |
| O                                              | 1.090453  | -0.216616 | -0.000036 |                               |        |        |         |         |         |

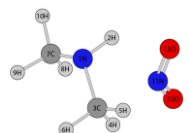

| Geometry – RC1a – C <sub>s</sub> |             |             |             | Frequency (cm <sup>-1</sup> ) |         |         |                 |         |         |
|----------------------------------|-------------|-------------|-------------|-------------------------------|---------|---------|-----------------|---------|---------|
| N                                | 1.84545600  | 0.00030700  | -0.46457200 | 18.03                         | 39.19   | 48.45   | 82.38           | 91.65   | 124.90  |
| H                                | 1.22607300  | 0.00342900  | -1.26495300 | 237.30                        | 271.82  | 391.21  | 778.02          | 790.12  | 967.38  |
| C                                | 1.63854400  | -1.20125100 | 0.31458200  | 1031.47                       | 1095.69 | 1180.16 | 1203.61         | 1266.06 | 1427.15 |
| H                                | 0.65398800  | -1.23461700 | 0.82103600  | 1454.77                       | 1462.49 | 1475.45 | 1476.53         | 1479.84 | 1501.95 |
| H                                | 1.73112900  | -2.08662100 | -0.32105100 | 1508.47                       | 1799.25 | 2931.78 | 2936.09         | 3058.35 | 3060.72 |
| H                                | 2.40571200  | -1.26603300 | 1.09548500  | 3120.80                       | 3120.91 | 3577.74 | T1 value: 0.017 |         |         |
| C                                | 1.64173900  | 1.19802200  | 0.32135100  |                               |         |         |                 |         |         |
| H                                | 0.65721800  | 1.23117500  | 0.82785900  |                               |         |         |                 |         |         |
| H                                | 2.40904800  | 1.25635400  | 1.10262000  |                               |         |         |                 |         |         |
| H                                | 1.73676500  | 2.08669200  | -0.30930200 |                               |         |         |                 |         |         |
| N                                | -1.64344800 | 0.00282600  | 0.08739100  |                               |         |         |                 |         |         |
| O                                | -2.67272200 | -0.00441400 | 0.65429300  |                               |         |         |                 |         |         |
| O                                | -1.31673800 | 0.00529700  | -1.04517000 |                               |         |         |                 |         |         |

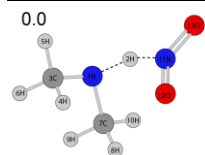

| Geometry – TS1a – C <sub>s</sub> |           |           |           | Frequency (cm <sup>-1</sup> ) |                 |  |  |  |  |
|----------------------------------|-----------|-----------|-----------|-------------------------------|-----------------|--|--|--|--|
| N                                | -1.162187 | 0.092244  | -0.568393 | -1819.16                      | T1 value: 0.039 |  |  |  |  |
| H                                | 0.094637  | 0.113156  | -0.534186 | 37.03                         |                 |  |  |  |  |
| C                                | -1.674793 | 1.169846  | 0.232030  | 391.51                        |                 |  |  |  |  |
| H                                | -1.348320 | 1.051645  | 1.280265  | 1030.14                       |                 |  |  |  |  |
| H                                | -1.316387 | 2.130397  | -0.145476 | 1426.97                       |                 |  |  |  |  |
| H                                | -2.772577 | 1.155805  | 0.224352  | 1632.88                       |                 |  |  |  |  |
| C                                | -1.625361 | -1.197723 | -0.136969 | 3137.75                       |                 |  |  |  |  |
| H                                | -1.297038 | -1.390899 | 0.899486  | 3138.57                       |                 |  |  |  |  |
| H                                | -2.722835 | -1.226673 | -0.146668 |                               |                 |  |  |  |  |
| H                                | -1.230750 | -1.982454 | -0.786664 |                               |                 |  |  |  |  |
| N                                | 1.246027  | 0.048796  | 0.031781  |                               |                 |  |  |  |  |
| O                                | 1.211733  | -0.138313 | 1.226444  |                               |                 |  |  |  |  |
| O                                | 2.232664  | 0.174455  | -0.642340 |                               |                 |  |  |  |  |



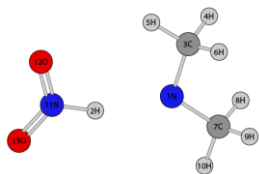

| Geometry – PC1a – C <sub>1</sub> |             |             |             | Frequency (cm <sup>-1</sup> ) |         |         |         |         |         |
|----------------------------------|-------------|-------------|-------------|-------------------------------|---------|---------|---------|---------|---------|
| N                                | 1.24864400  | -0.14562800 | -0.00102700 | 6.73                          | 33.24   | 64.38   | 86.48   | 124.43  | 147.81  |
| H                                | -0.58534900 | -0.36823500 | 0.00005800  | 153.15                        | 284.93  | 444.46  | 808.43  | 957.83  | 963.45  |
| C                                | 1.66477500  | 1.22626200  | -0.00094800 | 1011.57                       | 1027.40 | 1219.08 | 1234.05 | 1239.84 | 1385.56 |
| H                                | 2.28565100  | 1.43928500  | -0.88640400 | 1405.43                       | 1450.33 | 1455.08 | 1456.60 | 1478.37 | 1481.32 |
| H                                | 0.79749400  | 1.89063500  | 0.00218300  | 1600.44                       | 1713.59 | 2946.90 | 2971.99 | 2979.73 | 3028.93 |
| H                                | 2.29185500  | 1.43822100  | 0.88038100  | 3034.33                       | 3130.59 | 3134.68 |         |         |         |
| C                                | 2.34700800  | -1.06321500 | 0.00087200  |                               |         |         |         |         |         |
| H                                | 2.99373500  | -0.89349900 | -0.87525600 | T1 value: 0.017               |         |         |         |         |         |
| H                                | 2.97783800  | -0.90564500 | 0.89084500  |                               |         |         |         |         |         |
| H                                | 1.99421800  | -2.09668700 | -0.00861600 |                               |         |         |         |         |         |
| N                                | -1.61726400 | -0.12043600 | 0.00015500  |                               |         |         |         |         |         |
| O                                | -1.85884900 | 1.06507000  | 0.00163500  |                               |         |         |         |         |         |
| O                                | -2.42187600 | -1.01755800 | -0.00121300 |                               |         |         |         |         |         |

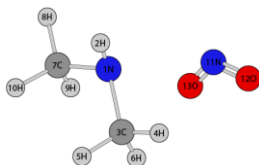

| Geometry – RC1b – C <sub>1</sub> |             |             |             | Frequency (cm <sup>-1</sup> ) |         |         |         |         |         |
|----------------------------------|-------------|-------------|-------------|-------------------------------|---------|---------|---------|---------|---------|
| N                                | -1.15353000 | 0.24335300  | -0.52156400 | 45.88                         | 97.17   | 114.04  | 125.79  | 159.51  | 193.57  |
| H                                | -1.56805300 | 0.66007400  | -1.34509400 | 235.81                        | 276.48  | 388.79  | 775.38  | 790.74  | 962.82  |
| C                                | -1.10039200 | 1.20683400  | 0.56107400  | 1032.82                       | 1097.13 | 1190.11 | 1196.51 | 1264.75 | 1427.55 |
| H                                | -0.59058500 | 2.11685200  | 0.23085100  | 1453.74                       | 1460.67 | 1470.15 | 1473.78 | 1481.91 | 1503.99 |
| H                                | -2.09376700 | 1.47980000  | 0.95726900  | 1508.32                       | 1785.37 | 2973.88 | 2976.67 | 3061.60 | 3073.55 |
| H                                | -0.52186400 | 0.77998300  | 1.39130800  | 3123.69                       | 3127.00 | 3574.58 |         |         |         |
| C                                | -1.86332700 | -0.96474100 | -0.14815600 |                               |         |         |         |         |         |
| H                                | -1.93473200 | -1.63989100 | -1.00586200 | T1 value: 0.017               |         |         |         |         |         |
| H                                | -1.29909400 | -1.48069900 | 0.63837300  |                               |         |         |         |         |         |
| H                                | -2.88037100 | -0.77425700 | 0.23684800  |                               |         |         |         |         |         |
| N                                | 1.51844300  | -0.30253600 | -0.28133200 |                               |         |         |         |         |         |
| O                                | 1.92490100  | 0.80042900  | -0.33784700 |                               |         |         |         |         |         |
| O                                | 1.33964800  | -1.07294600 | 0.59273000  |                               |         |         |         |         |         |

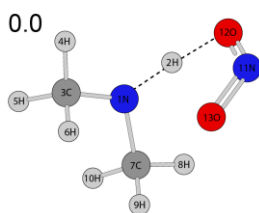

| Geometry – TS1b – C <sub>s</sub> |           |           |           | Frequency (cm <sup>-1</sup> ) |         |         |         |         |         |
|----------------------------------|-----------|-----------|-----------|-------------------------------|---------|---------|---------|---------|---------|
| N                                | -0.958765 | -0.000048 | -0.471980 | -778.93                       |         |         |         |         |         |
| H                                | 0.153145  | 0.000111  | -0.862803 | 45.05                         | 80.28   | 118.14  | 122.47  | 165.52  | 235.82  |
| C                                | -1.495620 | 1.219699  | 0.050132  | 291.87                        | 354.16  | 570.17  | 887.55  | 978.01  | 1026.59 |
| H                                | -0.952039 | 2.072608  | -0.360496 | 1043.25                       | 1048.88 | 1231.00 | 1231.63 | 1337.96 | 1393.70 |
| H                                | -2.558572 | 1.293762  | -0.220111 | 1407.06                       | 1441.34 | 1458.17 | 1462.71 | 1487.31 | 1506.90 |
| H                                | -1.424138 | 1.235436  | 1.146264  | 1581.84                       | 1593.76 | 3005.66 | 3009.09 | 3070.80 | 3072.66 |
| C                                | -1.495331 | -1.219974 | 0.050007  | 3150.00                       | 3150.20 |         |         |         |         |
| H                                | -0.951642 | -2.072721 | -0.360814 |                               |         |         |         |         |         |
| H                                | -1.423721 | -1.235867 | 1.146129  | T1 value: 0.031               |         |         |         |         |         |
| H                                | -2.558302 | -1.294187 | -0.220121 |                               |         |         |         |         |         |
| N                                | 1.921286  | 0.000318  | 0.224693  |                               |         |         |         |         |         |
| O                                | 1.471576  | 0.000306  | -0.958786 |                               |         |         |         |         |         |
| O                                | 1.085957  | 0.000151  | 1.101281  |                               |         |         |         |         |         |

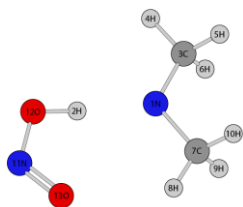

| Geometry – PC1b – C <sub>1</sub> |             |             |             | Frequency (cm <sup>-1</sup> ) |         |         |         |         |         |
|----------------------------------|-------------|-------------|-------------|-------------------------------|---------|---------|---------|---------|---------|
| N                                | 1.17693800  | -0.09418600 | 0.00040300  | 22.39                         | 88.10   | 93.68   | 104.32  | 125.03  | 164.17  |
| H                                | -0.51365200 | -0.71976400 | 0.00071800  | 196.06                        | 233.77  | 448.07  | 764.10  | 934.15  | 958.87  |
| C                                | 2.38247900  | -0.86593000 | -0.00074300 | 1009.04                       | 1021.24 | 1028.57 | 1094.46 | 1220.86 | 1240.52 |
| H                                | 2.16150300  | -1.93568900 | -0.00161000 | 1384.05                       | 1404.52 | 1449.35 | 1456.26 | 1477.47 | 1480.12 |
| H                                | 2.99554100  | -0.62345500 | -0.88389300 | 1511.60                       | 1738.04 | 2972.98 | 2978.80 | 3029.50 | 3034.98 |
| H                                | 2.99586900  | -0.62510400 | 0.88266100  | 3129.53                       | 3141.19 |         |         |         |         |
| C                                | 1.41404400  | 1.31736300  | 0.00057100  | 3176.82                       |         |         |         |         |         |
| H                                | 0.46791300  | 1.86256000  | 0.00108200  |                               |         |         |         |         |         |
| H                                | 2.00614900  | 1.60752200  | 0.88382200  |                               |         |         |         |         |         |
| H                                | 2.00558900  | 1.60799200  | -0.88287100 |                               |         |         |         |         |         |
| N                                | -2.34868800 | -0.19262300 | -0.00014800 |                               |         |         |         |         |         |
| O                                | -1.41952000 | -1.14258800 | 0.00077700  |                               |         |         |         |         |         |
| O                                | -1.91745400 | 0.90821300  | -0.00086000 |                               |         |         |         |         |         |
|                                  |             |             |             | T1 value: 0.017               |         |         |         |         |         |

0.0

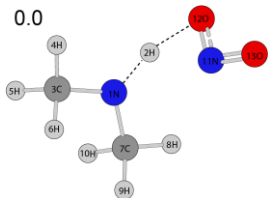

| Geometry – TS1c – C <sub>s</sub> |           |           |           | Frequency (cm <sup>-1</sup> ) |         |         |         |         |         |
|----------------------------------|-----------|-----------|-----------|-------------------------------|---------|---------|---------|---------|---------|
| N                                | -1.103131 | 0.000006  | 0.219450  | -1444.69                      |         |         |         |         |         |
| H                                | -0.133514 | -0.000098 | 0.809384  | 26.85                         | 63.16   | 99.79   | 120.21  | 135.54  | 213.73  |
| C                                | -1.715302 | -1.227384 | -0.169048 | 316.79                        | 353.90  | 632.49  | 836.00  | 980.50  | 1033.69 |
| H                                | -1.102186 | -2.068104 | 0.159052  | 1041.12                       | 1055.39 | 1222.12 | 1242.64 | 1348.04 | 1398.52 |
| H                                | -2.722170 | -1.307483 | 0.269919  | 1409.98                       | 1441.52 | 1452.08 | 1461.24 | 1480.96 | 1595.97 |
| H                                | -1.830874 | -1.262174 | -1.261556 | 1597.33                       | 1670.29 | 2989.97 | 2992.53 | 3054.75 | 3056.07 |
| C                                | -1.715522 | 1.227528  | -0.168283 | 3153.84                       | 3154.15 |         |         |         |         |
| H                                | -1.102366 | 2.068146  | 0.160004  |                               |         |         |         |         |         |
| H                                | -1.831512 | 1.262812  | -1.260730 |                               |         |         |         |         |         |
| H                                | -2.722233 | 1.307353  | 0.271100  |                               |         |         |         |         |         |
| N                                | 1.409821  | -0.000127 | -0.237397 |                               |         |         |         |         |         |
| O                                | 1.230390  | -0.000041 | 1.018938  |                               |         |         |         |         |         |
| O                                | 2.522841  | -0.000124 | -0.662972 |                               |         |         |         |         |         |
|                                  |           |           |           | T1 value: 0.030               |         |         |         |         |         |

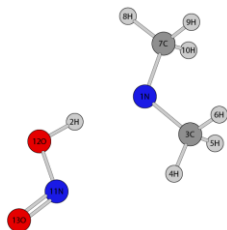

| Geometry – PC1c – C <sub>1</sub> |             |             |             | Frequency (cm <sup>-1</sup> ) |         |         |         |         |         |
|----------------------------------|-------------|-------------|-------------|-------------------------------|---------|---------|---------|---------|---------|
| N                                | 1.36345700  | -0.10022500 | 0.00221900  | 13.25                         | 71.39   | 81.62   | 93.55   | 124.69  | 140.81  |
| H                                | -0.31356600 | -0.74745100 | 0.01061700  | 196.87                        | 218.49  | 447.85  | 769.79  | 897.01  | 959.26  |
| C                                | 1.50360600  | 1.32544000  | 0.00533400  | 997.53                        | 1010.55 | 1025.41 | 1029.83 | 1221.77 | 1241.08 |
| H                                | 0.52308400  | 1.80694100  | 0.00056700  | 1384.56                       | 1405.43 | 1451.58 | 1456.94 | 1478.19 | 1482.40 |
| H                                | 2.06711900  | 1.65350200  | 0.89398800  | 1535.11                       | 1812.17 | 2974.05 | 2979.88 | 3031.39 | 3036.77 |
| H                                | 2.07980000  | 1.65886500  | -0.87299500 | 3133.02                       | 3133.87 | 3347.25 |         |         |         |
| C                                | 2.61914700  | -0.78648100 | -0.00812800 |                               |         |         |         |         |         |
| H                                | 2.47333700  | -1.86884900 | -0.00186600 |                               |         |         |         |         |         |
| H                                | 3.20330300  | -0.50661100 | -0.89982500 |                               |         |         |         |         |         |
| H                                | 3.22437200  | -0.49826900 | 0.86663600  |                               |         |         |         |         |         |
| N                                | -1.86177700 | 0.26767600  | -0.00723900 |                               |         |         |         |         |         |
| O                                | -1.28173700 | -0.94635700 | 0.01382600  |                               |         |         |         |         |         |
| O                                | -3.03147800 | 0.20835200  | -0.00697800 |                               |         |         |         |         |         |
|                                  |             |             |             | T1 value: 0.017               |         |         |         |         |         |

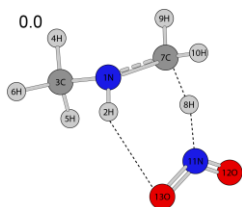

| Geometry – TS2a – C <sub>1</sub> |           |           |           | Frequency (cm <sup>-1</sup> ) |         |         |         |         |         |
|----------------------------------|-----------|-----------|-----------|-------------------------------|---------|---------|---------|---------|---------|
| N                                | 1.698369  | 0.207486  | -0.463549 | -1625.20                      |         |         |         |         |         |
| H                                | 1.503048  | -0.210880 | -1.362596 | 44.43                         | 106.04  | 119.19  | 167.04  | 255.79  | 268.45  |
| C                                | 1.999899  | -0.742217 | 0.583780  | 396.61                        | 453.14  | 547.09  | 697.51  | 842.13  | 991.40  |
| H                                | 2.420059  | -0.207798 | 1.441628  | 1053.83                       | 1092.20 | 1136.20 | 1258.09 | 1306.81 | 1350.37 |
| H                                | 1.102961  | -1.288833 | 0.912271  | 1429.99                       | 1444.38 | 1464.37 | 1473.63 | 1484.53 | 1528.42 |
| H                                | 2.738417  | -1.464611 | 0.229104  | 1540.53                       | 1679.51 | 3005.24 | 3084.22 | 3094.15 | 3143.61 |
| C                                | 0.915205  | 1.300698  | -0.148928 | 3183.94                       | 3617.26 |         |         |         |         |
| H                                | -0.335917 | 0.797745  | 0.055640  | T1 value: 0.020               |         |         |         |         |         |
| H                                | 1.182469  | 1.773498  | 0.798770  |                               |         |         |         |         |         |
| H                                | 0.771657  | 2.001035  | -0.972896 |                               |         |         |         |         |         |
| N                                | -1.342445 | -0.060625 | -0.004403 |                               |         |         |         |         |         |
| O                                | -2.363326 | 0.122249  | 0.594737  |                               |         |         |         |         |         |
| O                                | -1.070491 | -1.006235 | -0.705073 |                               |         |         |         |         |         |

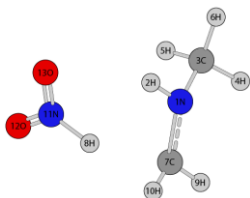

| Geometry – PC2a – C <sub>1</sub> |             |             |             | Frequency (cm <sup>-1</sup> ) |         |         |         |         |         |
|----------------------------------|-------------|-------------|-------------|-------------------------------|---------|---------|---------|---------|---------|
| N                                | 1.68121400  | 0.06391500  | -0.42838500 | 29.92                         | 77.04   | 105.36  | 135.30  | 151.45  | 204.88  |
| H                                | 1.31064100  | -0.26806000 | -1.30706500 | 229.42                        | 404.88  | 436.23  | 668.72  | 771.48  | 813.13  |
| C                                | 1.84292300  | -0.95473000 | 0.58300600  | 990.13                        | 1046.36 | 1133.44 | 1190.22 | 1255.46 | 1330.55 |
| H                                | 2.46287800  | -0.55857700 | 1.39353000  | 1435.89                       | 1456.56 | 1469.36 | 1474.63 | 1482.37 | 1547.79 |
| H                                | 0.88180900  | -1.28230600 | 1.00923500  | 1556.39                       | 1716.59 | 2801.29 | 2994.81 | 3086.96 | 3138.94 |
| H                                | 2.34586300  | -1.82602500 | 0.15733300  | 3139.17                       | 3253.78 | 3626.92 |         |         |         |
| C                                | 1.29582300  | 1.32540700  | -0.05832600 | T1 value: 0.018               |         |         |         |         |         |
| H                                | -0.63769200 | 0.76062300  | 0.19859800  |                               |         |         |         |         |         |
| H                                | 1.66350200  | 1.67847700  | 0.90090300  |                               |         |         |         |         |         |
| H                                | 1.16490900  | 2.04939300  | -0.85611200 |                               |         |         |         |         |         |
| N                                | -1.45213600 | 0.09842100  | 0.00340100  |                               |         |         |         |         |         |
| O                                | -2.44168700 | 0.21097900  | 0.67555200  |                               |         |         |         |         |         |
| O                                | -1.26180500 | -0.70022200 | -0.88425300 |                               |         |         |         |         |         |

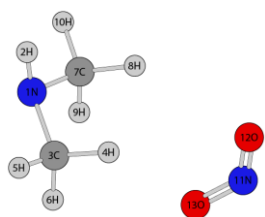

| Geometry – RC2b – C <sub>s</sub> |             |             |             | Frequency (cm <sup>-1</sup> ) |         |         |         |         |         |
|----------------------------------|-------------|-------------|-------------|-------------------------------|---------|---------|---------|---------|---------|
| N                                | 2.22042600  | 0.01530800  | -0.12671200 | 29.11                         | 44.55   | 64.06   | 75.70   | 92.14   | 92.95   |
| H                                | 2.63401700  | 0.03617400  | -1.05001700 | 253.64                        | 285.57  | 395.45  | 778.82  | 784.74  | 967.45  |
| C                                | 1.44911500  | -1.19882000 | 0.04553900  | 1031.44                       | 1098.32 | 1187.16 | 1200.30 | 1266.41 | 1426.97 |
| H                                | 0.54568000  | -1.23910500 | -0.59255300 | 1454.86                       | 1462.20 | 1474.26 | 1476.91 | 1481.51 | 1502.88 |
| H                                | 2.06745000  | -2.07467900 | -0.17253200 | 1506.67                       | 1795.00 | 2942.36 | 2944.89 | 3060.00 | 3063.83 |
| H                                | 1.11825500  | -1.27071100 | 1.08845700  | 3116.46                       | 3118.32 | 3575.52 |         |         |         |
| C                                | 1.41585100  | 1.20114300  | 0.08436600  | T1 value: 0.017               |         |         |         |         |         |
| H                                | 0.51141000  | 1.23593100  | -0.55278000 |                               |         |         |         |         |         |
| H                                | 1.08454300  | 1.23069300  | 1.12927700  |                               |         |         |         |         |         |
| H                                | 2.00868700  | 2.10074000  | -0.10610400 |                               |         |         |         |         |         |
| N                                | -2.16428000 | 0.02546000  | 0.07075800  |                               |         |         |         |         |         |
| O                                | -1.90901300 | 0.00561100  | -1.07866200 |                               |         |         |         |         |         |
| O                                | -1.53509500 | -0.04540600 | 1.06222400  |                               |         |         |         |         |         |

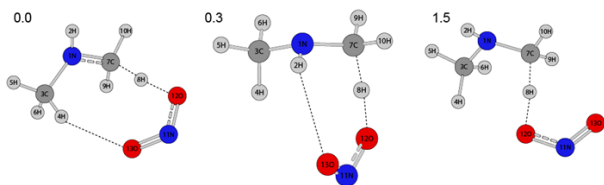

| Geometry – TS2b – C <sub>1</sub> |           |           |           | Frequency (cm <sup>-1</sup> ) |         |         |         |         |         |  |
|----------------------------------|-----------|-----------|-----------|-------------------------------|---------|---------|---------|---------|---------|--|
| N                                | 1.772492  | 0.377627  | -0.323686 | -994.25                       |         |         |         |         |         |  |
| H                                | 1.926136  | 0.629024  | -1.288303 | 35.51                         | 101.27  | 129.42  | 148.11  | 195.85  | 275.20  |  |
| C                                | 1.887414  | -1.025300 | -0.011461 | 416.44                        | 490.52  | 506.86  | 642.98  | 892.26  | 989.30  |  |
| H                                | 0.966052  | -1.572392 | -0.259607 | 1059.73                       | 1091.36 | 1132.91 | 1259.30 | 1295.48 | 1309.79 |  |
| H                                | 2.732305  | -1.456237 | -0.553610 | 1368.55                       | 1436.35 | 1441.81 | 1454.13 | 1469.63 | 1483.79 |  |
| H                                | 2.062495  | -1.140173 | 1.062975  | 1538.44                       | 1587.22 | 3011.16 | 3066.87 | 3093.03 | 3142.81 |  |
| C                                | 0.885895  | 1.168429  | 0.381019  | 3160.88                       | 3639.38 |         |         |         |         |  |
| H                                | -0.327617 | 0.953996  | 0.046733  |                               |         |         |         |         |         |  |
| H                                | 0.880815  | 0.942073  | 1.450807  |                               |         |         |         |         |         |  |
| H                                | 0.994785  | 2.235043  | 0.167781  |                               |         |         |         |         |         |  |
| N                                | -2.061254 | -0.303267 | -0.055812 |                               |         |         |         |         |         |  |
| O                                | -1.655343 | 0.869935  | -0.275515 |                               |         |         |         |         |         |  |
| O                                | -1.265538 | -1.115229 | 0.325241  |                               |         |         |         |         |         |  |
|                                  |           |           |           | T1 value: 0.027               |         |         |         |         |         |  |

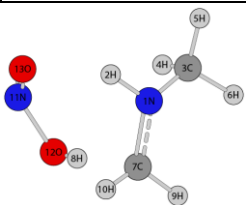

| Geometry – PC2b – C <sub>1</sub> |             |             |             | Frequency (cm <sup>-1</sup> ) |         |         |         |         |         |  |
|----------------------------------|-------------|-------------|-------------|-------------------------------|---------|---------|---------|---------|---------|--|
| N                                | 1.59695500  | -0.09179500 | -0.49895800 | 30.29                         | 69.85   | 114.11  | 124.14  | 159.28  | 168.33  |  |
| H                                | 1.14910600  | -0.50980300 | -1.30139000 | 209.89                        | 403.83  | 418.41  | 668.84  | 742.31  | 752.02  |  |
| C                                | 1.68250900  | -0.95705300 | 0.65547300  | 875.74                        | 989.34  | 1043.28 | 1060.56 | 1135.38 | 1255.29 |  |
| H                                | 0.70624300  | -1.10116300 | 1.14523900  | 1329.70                       | 1431.51 | 1436.85 | 1468.20 | 1474.99 | 1483.34 |  |
| H                                | 2.07511300  | -1.93357300 | 0.36263800  | 1550.81                       | 1741.14 | 2992.91 | 3086.88 | 3140.21 | 3140.55 |  |
| H                                | 2.36811800  | -0.51304400 | 1.38429900  | 3257.65                       | 3282.81 | 3624.58 |         |         |         |  |
| C                                | 1.33260600  | 1.23948300  | -0.31266800 |                               |         |         |         |         |         |  |
| H                                | -0.63124100 | 0.96065600  | 0.31710000  |                               |         |         |         |         |         |  |
| H                                | 1.77009000  | 1.69851600  | 0.56944300  |                               |         |         |         |         |         |  |
| H                                | 1.20964200  | 1.84543300  | -1.20376400 |                               |         |         |         |         |         |  |
| N                                | -2.07090100 | -0.26967500 | 0.08891200  |                               |         |         |         |         |         |  |
| O                                | -1.51504000 | 0.76135700  | 0.72646200  |                               |         |         |         |         |         |  |
| O                                | -1.41247800 | -0.71277200 | -0.78397100 |                               |         |         |         |         |         |  |
|                                  |             |             |             | T1 value: 0.018               |         |         |         |         |         |  |

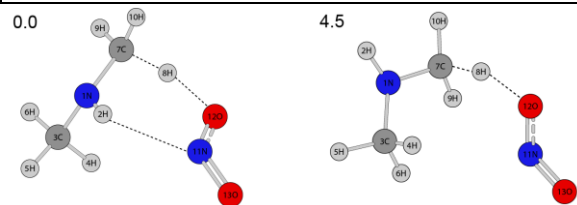

| Geometry – TS2c – C <sub>1</sub> |           |           |           | Frequency (cm <sup>-1</sup> ) |         |         |         |         |         |  |
|----------------------------------|-----------|-----------|-----------|-------------------------------|---------|---------|---------|---------|---------|--|
| N                                | -1.493586 | 0.070838  | -0.584978 | -853.94                       |         |         |         |         |         |  |
| H                                | -0.926730 | 0.404047  | -1.354148 | 86.09                         | 97.42   | 148.13  | 180.87  | 210.53  | 309.55  |  |
| C                                | -1.813393 | 1.058734  | 0.418096  | 411.52                        | 477.81  | 601.20  | 720.05  | 813.09  | 988.53  |  |
| H                                | -0.967650 | 1.219856  | 1.102574  | 1055.21                       | 1099.71 | 1149.15 | 1249.27 | 1292.41 | 1356.76 |  |
| H                                | -2.067330 | 2.006502  | -0.060497 | 1364.46                       | 1433.32 | 1456.42 | 1473.13 | 1480.94 | 1530.97 |  |
| H                                | -2.672052 | 0.713255  | 1.002258  | 1606.04                       | 1640.78 | 3009.70 | 3071.18 | 3098.04 | 3152.85 |  |
| C                                | -1.232758 | -1.228105 | -0.178162 | 3162.35                       | 3608.13 |         |         |         |         |  |
| H                                | -0.124872 | -1.208326 | 0.345993  |                               |         |         |         |         |         |  |
| H                                | -1.933323 | -1.573438 | 0.587316  |                               |         |         |         |         |         |  |
| H                                | -1.132229 | -1.925121 | -1.013388 |                               |         |         |         |         |         |  |
| N                                | 1.284635  | 0.197079  | -0.181520 |                               |         |         |         |         |         |  |
| O                                | 1.208317  | -0.754517 | 0.652304  |                               |         |         |         |         |         |  |
| O                                | 2.299478  | 0.829954  | -0.210581 |                               |         |         |         |         |         |  |
|                                  |           |           |           | T1 value: 0.044               |         |         |         |         |         |  |

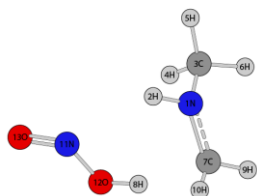

| Geometry – PC2c – C <sub>1</sub> |             |             |             | Frequency (cm <sup>-1</sup> ) |         |         |         |         |         |
|----------------------------------|-------------|-------------|-------------|-------------------------------|---------|---------|---------|---------|---------|
| N                                | 1.61864000  | -0.13022600 | -0.56733300 | 35.39                         | 71.52   | 104.87  | 134.21  | 142.99  | 178.84  |
| H                                | 1.03581000  | -0.34397000 | -1.36310200 | 210.28                        | 396.04  | 416.85  | 647.68  | 748.39  | 753.13  |
| C                                | 1.71019300  | -1.18063700 | 0.42070800  | 828.99                        | 986.39  | 990.81  | 1046.59 | 1136.85 | 1256.16 |
| H                                | 0.79904800  | -1.26185700 | 1.03365800  | 1330.63                       | 1437.88 | 1442.82 | 1468.40 | 1475.30 | 1487.38 |
| H                                | 1.89005400  | -2.13953300 | -0.07079300 | 1553.72                       | 1817.35 | 2996.93 | 3086.73 | 3140.66 | 3142.33 |
| H                                | 2.55320000  | -0.97118000 | 1.08706500  | 3257.42                       | 3450.61 | 3628.84 |         |         |         |
| C                                | 1.61532200  | 1.17797400  | -0.16166200 |                               |         |         |         |         |         |
| H                                | -0.32098000 | 1.07259000  | 0.54324100  | T1 value: 0.018               |         |         |         |         |         |
| H                                | 2.21707400  | 1.41230000  | 0.71160000  |                               |         |         |         |         |         |
| H                                | 1.51102500  | 1.93118500  | -0.93525900 |                               |         |         |         |         |         |
| N                                | -1.50386300 | -0.06783400 | -0.32616200 |                               |         |         |         |         |         |
| O                                | -1.23313200 | 0.74892900  | 0.71878700  |                               |         |         |         |         |         |
| O                                | -2.57208800 | -0.53607200 | -0.25706500 |                               |         |         |         |         |         |

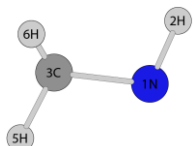

| Geometry – CH <sub>3</sub> NH – C <sub>5</sub> |             |             |             | Frequency (cm <sup>-1</sup> ) |         |         |         |         |         |
|------------------------------------------------|-------------|-------------|-------------|-------------------------------|---------|---------|---------|---------|---------|
| N                                              | 0.79861500  | -0.15307000 | 0.00001400  | 208.86                        | 950.56  | 1000.78 | 1077.34 | 1328.09 | 1387.49 |
| H                                              | 1.21641900  | 0.78145700  | -0.00008100 | 1468.38                       | 1473.53 | 2971.99 | 3023.71 | 3112.92 | 3434.82 |
| C                                              | -0.62558200 | 0.01321000  | 0.00001400  |                               |         |         |         |         |         |
| H                                              | -0.96288400 | 0.58438100  | -0.88068200 |                               |         |         |         |         |         |
| H                                              | -1.12744100 | -0.95820700 | 0.00003700  |                               |         |         |         |         |         |
| H                                              | -0.96290800 | 0.58460100  | 0.88054400  |                               |         |         |         |         |         |

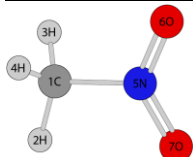

| Geometry – CH <sub>3</sub> NO <sub>2</sub> – C <sub>1</sub> |             |             |             | Frequency (cm <sup>-1</sup> ) |         |         |         |         |         |
|-------------------------------------------------------------|-------------|-------------|-------------|-------------------------------|---------|---------|---------|---------|---------|
| C                                                           | -1.31389800 | -0.03690900 | -0.00047300 | 11.72                         | 484.83  | 643.97  | 687.19  | 973.65  | 1110.24 |
| H                                                           | -1.62911900 | -1.07632300 | -0.05120100 | 1141.46                       | 1398.94 | 1449.11 | 1461.08 | 1506.91 | 1706.52 |
| H                                                           | -1.64999700 | 0.54270400  | -0.86049900 | 3093.37                       | 3192.34 | 3223.53 |         |         |         |
| H                                                           | -1.64302800 | 0.44780700  | 0.91947800  |                               |         |         |         |         |         |
| N                                                           | 0.17493900  | 0.00000100  | -0.00144300 |                               |         |         |         |         |         |
| O                                                           | 0.68679900  | 1.09255500  | 0.00027700  |                               |         |         |         |         |         |
| O                                                           | 0.76082100  | -1.05414800 | 0.00036800  |                               |         |         |         |         |         |

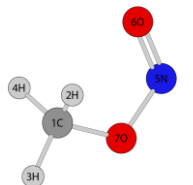

| Geometry – <i>cis</i> -CH <sub>3</sub> ONO – C <sub>5</sub> |             |             |             | Frequency (cm <sup>-1</sup> ) |         |         |         |         |         |
|-------------------------------------------------------------|-------------|-------------|-------------|-------------------------------|---------|---------|---------|---------|---------|
| C                                                           | 1.27706100  | 0.40895400  | 0.00002400  | 223.59                        | 370.61  | 381.18  | 773.98  | 917.01  | 1072.65 |
| H                                                           | 1.09589300  | 1.01831100  | -0.89102100 | 1166.05                       | 1202.84 | 1442.71 | 1467.71 | 1482.72 | 1759.21 |
| H                                                           | 2.29588800  | 0.02260400  | 0.00088800  | 3048.06                       | 3126.32 | 3176.18 |         |         |         |
| H                                                           | 1.09465300  | 1.01910600  | 0.89025200  |                               |         |         |         |         |         |
| N                                                           | -0.89111500 | -0.50811900 | 0.00005400  |                               |         |         |         |         |         |
| O                                                           | -1.18332200 | 0.62671900  | -0.00002600 |                               |         |         |         |         |         |
| O                                                           | 0.44444700  | -0.74633300 | -0.00005300 |                               |         |         |         |         |         |

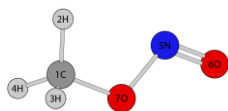

| Geometry – <i>trans</i> -CH <sub>3</sub> ONO – C <sub>s</sub> |             |             |             | Frequency (cm <sup>-1</sup> ) |         |         |         |         |         |
|---------------------------------------------------------------|-------------|-------------|-------------|-------------------------------|---------|---------|---------|---------|---------|
| C                                                             | -1.62035900 | 0.13053600  | -0.00028900 | 102.34                        | 224.01  | 395.55  | 666.29  | 907.70  | 1124.36 |
| H                                                             | -1.49197200 | 1.21738500  | 0.00154500  | 1175.38                       | 1214.12 | 1454.69 | 1474.28 | 1498.89 | 1825.01 |
| H                                                             | -2.16890400 | -0.18017700 | 0.89299100  | 3043.17                       | 3135.60 | 3138.11 |         |         |         |
| H                                                             | -2.16715600 | -0.17734200 | -0.89568100 |                               |         |         |         |         |         |
| N                                                             | 0.66446000  | 0.42804300  | 0.00051800  |                               |         |         |         |         |         |
| O                                                             | 1.71017800  | -0.07861200 | -0.00045200 |                               |         |         |         |         |         |
| O                                                             | -0.34780700 | -0.50131100 | 0.00035800  |                               |         |         |         |         |         |

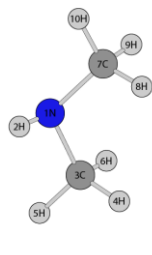

| Geometry – RC3a – C <sub>1</sub> |             |             |             | Frequency (cm <sup>-1</sup> ) |         |         |         |         |         |
|----------------------------------|-------------|-------------|-------------|-------------------------------|---------|---------|---------|---------|---------|
| N                                | -2.22314100 | -0.39867400 | -0.08380200 | 27.69                         | 66.18   | 76.37   | 82.89   | 95.15   | 110.08  |
| H                                | -2.84143000 | -0.69180200 | 0.66175000  | 265.68                        | 289.60  | 392.36  | 770.66  | 788.59  | 966.57  |
| C                                | -1.00910300 | -1.18683100 | -0.06103000 | 1030.57                       | 1099.86 | 1187.55 | 1202.08 | 1263.90 | 1424.99 |
| H                                | -0.36169300 | -0.97917700 | 0.81222300  | 1451.65                       | 1462.83 | 1475.09 | 1479.57 | 1481.57 | 1503.17 |
| H                                | -1.24823400 | -2.25429400 | -0.06778700 | 1509.18                       | 1797.04 | 2944.50 | 2955.38 | 3049.66 | 3062.83 |
| H                                | -0.42583700 | -0.97414600 | -0.96685900 | 3115.58                       | 3118.36 | 3576.92 |         |         |         |
| C                                | -1.95155300 | 1.02111800  | 0.02238700  |                               |         |         |         |         |         |
| H                                | -1.34811900 | 1.29020200  | 0.90844000  |                               |         |         |         |         |         |
| H                                | -1.39276200 | 1.34867100  | -0.86282500 |                               |         |         |         |         |         |
| H                                | -2.88960600 | 1.58318200  | 0.05261600  |                               |         |         |         |         |         |
| N                                | 2.05211200  | 0.25305500  | -0.25851500 |                               |         |         |         |         |         |
| O                                | 2.31299800  | -0.81080600 | 0.17104000  |                               |         |         |         |         |         |
| O                                | 1.37060400  | 1.14717800  | 0.09027500  |                               |         |         |         |         |         |

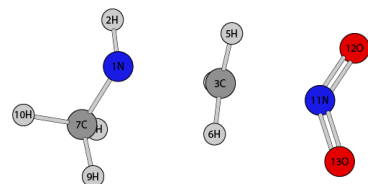

| Geometry – TS3a – C <sub>1</sub> |             |             |             | Frequency (cm <sup>-1</sup> ) |         |         |         |         |         |
|----------------------------------|-------------|-------------|-------------|-------------------------------|---------|---------|---------|---------|---------|
| N                                | -2.12758200 | 0.57362600  | 0.38556500  | -1230.47                      |         |         |         |         |         |
| H                                | -2.23175800 | 1.43272100  | -0.15900700 | 25.89                         | 119.94  | 134.65  | 160.39  | 218.37  | 253.75  |
| C                                | -0.23377500 | 0.26249600  | 0.26318000  | 308.27                        | 445.56  | 536.08  | 767.34  | 810.70  | 1006.98 |
| H                                | -0.34427400 | 0.28453000  | -0.81834500 | 1037.03                       | 1073.57 | 1142.12 | 1183.02 | 1193.21 | 1338.52 |
| H                                | -0.02511100 | 1.18027300  | 0.79852400  | 1354.48                       | 1359.64 | 1405.12 | 1422.48 | 1458.60 | 1486.97 |
| H                                | -0.34321200 | -0.67164600 | 0.80013400  | 1714.09                       | 2983.80 | 3046.99 | 3079.37 | 3104.79 | 3256.76 |
| C                                | -2.79645900 | -0.49447300 | -0.31790200 | 3290.51                       | 3461.91 |         |         |         |         |
| H                                | -2.52726400 | -0.58311800 | -1.38182200 |                               |         |         |         |         |         |
| H                                | -2.59208700 | -1.45005400 | 0.17616700  |                               |         |         |         |         |         |
| H                                | -3.88138100 | -0.31805700 | -0.27365800 |                               |         |         |         |         |         |
| N                                | 1.60670600  | -0.04924600 | -0.00748300 |                               |         |         |         |         |         |
| O                                | 2.25109400  | 0.90850200  | -0.31216600 |                               |         |         |         |         |         |
| O                                | 1.97048400  | -1.17768200 | 0.12963700  |                               |         |         |         |         |         |

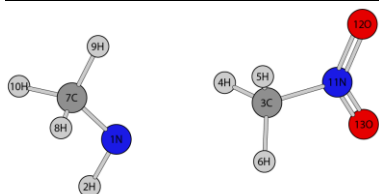

| Geometry – PC3a – C <sub>1</sub> |             |             |             | Frequency (cm <sup>-1</sup> ) |         |         |         |         |         |
|----------------------------------|-------------|-------------|-------------|-------------------------------|---------|---------|---------|---------|---------|
| N                                | 2.63069400  | -0.55669500 | 0.00484300  | 11.35                         | 21.69   | 42.12   | 50.31   | 65.39   | 70.71   |
| H                                | 3.07821600  | -1.47702800 | 0.00389600  | 104.88                        | 290.96  | 490.95  | 637.30  | 690.90  | 951.28  |
| C                                | -0.42989500 | -0.15956200 | -0.06633500 | 973.27                        | 1005.90 | 1081.61 | 1102.70 | 1133.93 | 1330.81 |
| H                                | -0.07292300 | -0.20913900 | 0.96321800  | 1376.54                       | 1388.04 | 1443.19 | 1449.06 | 1466.02 | 1475.64 |
| H                                | 0.01440400  | 0.69255000  | -0.57465300 | 1511.81                       | 1698.56 | 2981.98 | 3034.33 | 3105.33 | 3122.22 |
| H                                | -0.23485300 | -1.10164900 | -0.57267900 | 3205.17                       | 3236.98 | 3452.43 |         |         |         |
| C                                | 3.66864800  | 0.43227800  | 0.01798600  |                               |         |         |         |         |         |
| H                                | 4.32834600  | 0.32874300  | -0.85885300 |                               |         |         |         |         |         |
| H                                | 3.24493000  | 1.44011500  | 0.02193400  |                               |         |         |         |         |         |
| H                                | 4.31732700  | 0.31754400  | 0.90158800  |                               |         |         |         |         |         |
| N                                | -1.90292700 | 0.04559500  | -0.00822200 |                               |         |         |         |         |         |
| O                                | -2.30278500 | 1.18481900  | 0.01493900  |                               |         |         |         |         |         |
| O                                | -2.59750700 | -0.94103600 | 0.03872300  |                               |         |         |         |         |         |

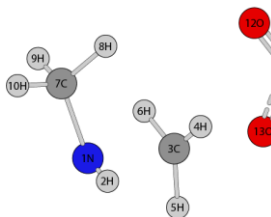

| Geometry – TS3b – C <sub>1</sub> |             |             |             | Frequency (cm <sup>-1</sup> ) |         |         |         |         |         |
|----------------------------------|-------------|-------------|-------------|-------------------------------|---------|---------|---------|---------|---------|
| N                                | -2.08479200 | -0.61385200 | 0.11821300  | -1112.17                      |         |         |         |         |         |
| H                                | -2.26367600 | -0.79853300 | 1.10780700  | 69.62                         | 77.42   | 159.37  | 207.05  | 232.94  | 267.71  |
| C                                | -0.20277200 | -0.83648100 | -0.06871500 | 325.63                        | 388.41  | 445.15  | 742.43  | 850.33  | 1011.86 |
| H                                | -0.14309400 | -0.24497100 | 0.84285500  | 1027.46                       | 1060.75 | 1122.88 | 1200.03 | 1210.66 | 1249.28 |
| H                                | -0.22345300 | -1.91689200 | -0.03612700 | 1328.18                       | 1335.48 | 1372.33 | 1406.49 | 1462.35 | 1478.28 |
| H                                | -0.23433600 | -0.33438500 | -1.02796100 | 1591.10                       | 2973.84 | 3051.47 | 3078.88 | 3109.81 | 3256.63 |
| C                                | -2.38062200 | 0.77079200  | -0.15075800 | 3306.94                       | 3465.57 |         |         |         |         |
| H                                | -1.75035000 | 1.46707500  | 0.42771600  |                               |         |         |         |         |         |
| H                                | -2.23355300 | 0.98178200  | -1.21461500 |                               |         |         |         |         |         |
| H                                | -3.42605300 | 0.98562600  | 0.11016900  |                               |         |         |         |         |         |
| N                                | 2.18483700  | 0.26092500  | 0.00051800  |                               |         |         |         |         |         |
| O                                | 1.48130900  | 1.21784400  | 0.13340200  |                               |         |         |         |         |         |
| O                                | 1.65301300  | -0.87722900 | -0.09891600 |                               |         |         |         |         |         |

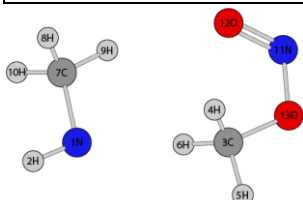

| Geometry – PC3b – C <sub>1</sub> |             |             |             | Frequency (cm <sup>-1</sup> ) |         |         |         |         |         |
|----------------------------------|-------------|-------------|-------------|-------------------------------|---------|---------|---------|---------|---------|
| N                                | 2.56055500  | 0.66669500  | -0.00139200 | 53.11                         | 59.60   | 72.19   | 96.98   | 112.37  | 148.42  |
| H                                | 3.55529100  | 0.90610300  | -0.00110400 | 265.36                        | 288.98  | 382.87  | 388.44  | 788.79  | 926.76  |
| C                                | -0.50614800 | 1.11361400  | 0.00071400  | 952.89                        | 1003.61 | 1072.31 | 1076.39 | 1156.84 | 1197.32 |
| H                                | -0.00189400 | 0.72327800  | 0.88924300  | 1324.79                       | 1387.49 | 1426.66 | 1460.64 | 1465.94 | 1473.07 |
| H                                | -0.48692000 | 2.20244400  | 0.00046700  | 1488.57                       | 1739.90 | 2969.91 | 3022.91 | 3058.60 | 3113.70 |
| H                                | -0.00054400 | 0.72296900  | -0.88685600 | 3142.23                       | 3188.97 | 3455.30 |         |         |         |
| C                                | 2.45220800  | -0.76356900 | 0.00079700  |                               |         |         |         |         |         |
| H                                | 2.94964800  | -1.19974400 | 0.88272900  |                               |         |         |         |         |         |
| H                                | 1.40235000  | -1.07413500 | -0.00044600 |                               |         |         |         |         |         |
| H                                | 2.95278400  | -1.20306700 | -0.87760100 |                               |         |         |         |         |         |
| N                                | -2.16156500 | -0.55776800 | -0.00032400 |                               |         |         |         |         |         |
| O                                | -1.21547200 | -1.25517400 | -0.00046500 |                               |         |         |         |         |         |
| O                                | -1.88952900 | 0.76259900  | 0.00002900  |                               |         |         |         |         |         |

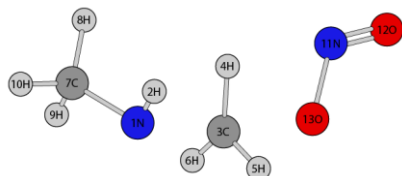

| Geometry – TS3c – C <sub>1</sub> |             |             |             | Frequency (cm <sup>-1</sup> ) |         |         |         |         |         |  |
|----------------------------------|-------------|-------------|-------------|-------------------------------|---------|---------|---------|---------|---------|--|
| N                                | 2.22938800  | -0.42196200 | -0.38215000 | -984.09                       |         |         |         |         |         |  |
| H                                | 2.27389700  | -0.32478800 | -1.39834800 | 43.78                         | 115.01  | 138.90  | 163.64  | 204.37  | 216.13  |  |
| C                                | 0.50764400  | -0.68717100 | 0.06140200  | 316.20                        | 413.00  | 418.05  | 697.90  | 795.40  | 1008.37 |  |
| H                                | 0.29528500  | 0.23700000  | -0.48583200 | 1015.75                       | 1061.00 | 1078.18 | 1231.33 | 1234.51 | 1254.37 |  |
| H                                | 0.39163400  | -1.64629900 | -0.42360000 | 1325.40                       | 1343.21 | 1386.23 | 1408.81 | 1456.35 | 1482.91 |  |
| H                                | 0.67595200  | -0.67177300 | 1.13049100  | 1688.60                       | 2998.53 | 3020.02 | 3065.00 | 3122.27 | 3230.29 |  |
| C                                | 2.79386400  | 0.74355400  | 0.24634600  | 3301.28                       | 3483.51 |         |         |         |         |  |
| H                                | 2.33600600  | 1.68660200  | -0.08661500 |                               |         |         |         |         |         |  |
| H                                | 2.69177900  | 0.66345800  | 1.33251100  |                               |         |         |         |         |         |  |
| H                                | 3.86204400  | 0.79663300  | -0.00502600 |                               |         |         |         |         |         |  |
| N                                | -1.84991100 | 0.39990100  | -0.23076200 |                               |         |         |         |         |         |  |
| O                                | -3.02457100 | 0.51418600  | -0.09184500 |                               |         |         |         |         |         |  |
| O                                | -1.34942700 | -0.62977500 | 0.38938500  |                               |         |         |         |         |         |  |

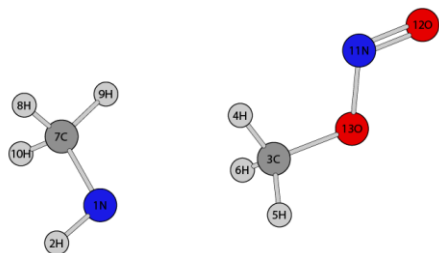

| Geometry – PC3c – C <sub>1</sub> |             |             |             | Frequency (cm <sup>-1</sup> ) |         |         |         |         |         |  |
|----------------------------------|-------------|-------------|-------------|-------------------------------|---------|---------|---------|---------|---------|--|
| N                                | 2.88708300  | -0.51753000 | -0.26065800 | 19.31                         | 42.51   | 78.33   | 81.80   | 94.16   | 114.18  |  |
| H                                | 3.79270100  | -0.90308600 | -0.53957300 | 135.33                        | 234.95  | 302.45  | 405.69  | 678.45  | 925.84  |  |
| C                                | -0.11318800 | -0.72213800 | 0.05933100  | 949.26                        | 1004.02 | 1077.66 | 1115.14 | 1164.58 | 1211.35 |  |
| H                                | 0.18990400  | 0.07510700  | -0.62493600 | 1325.19                       | 1386.36 | 1432.89 | 1462.68 | 1466.42 | 1477.94 |  |
| H                                | 0.12622100  | -1.69123500 | -0.38124700 | 1488.86                       | 1812.36 | 2972.19 | 3026.11 | 3053.75 | 3103.79 |  |
| H                                | 0.41690900  | -0.61573200 | 1.00965500  | 3143.78                       | 3161.93 | 3460.11 |         |         |         |  |
| C                                | 3.09711000  | 0.83426800  | 0.16695900  |                               |         |         |         |         |         |  |
| H                                | 3.53160000  | 1.44614400  | -0.64037600 |                               |         |         |         |         |         |  |
| H                                | 2.15338000  | 1.29107500  | 0.48179700  |                               |         |         |         |         |         |  |
| H                                | 3.81031300  | 0.88417300  | 1.00571500  |                               |         |         |         |         |         |  |
| N                                | -2.05450200 | 0.47724000  | -0.24808600 |                               |         |         |         |         |         |  |
| O                                | -3.20086800 | 0.54808400  | -0.05163400 |                               |         |         |         |         |         |  |
| O                                | -1.51821000 | -0.65773400 | 0.28818800  |                               |         |         |         |         |         |  |

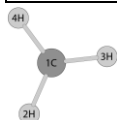

| Geometry – CH <sub>3</sub> – D <sub>3h</sub> |             |             |             | Frequency (cm <sup>-1</sup> ) |         |         |         |         |         |  |
|----------------------------------------------|-------------|-------------|-------------|-------------------------------|---------|---------|---------|---------|---------|--|
| C                                            | 0.00028000  | 0.00002300  | -0.00000300 | 517.33                        | 1404.11 | 1405.63 | 3134.22 | 3310.25 | 3319.21 |  |
| H                                            | -0.43157400 | -0.99058800 | 0.00000700  |                               |         |         |         |         |         |  |
| H                                            | 1.07360600  | 0.12231500  | 0.00000700  |                               |         |         |         |         |         |  |
| H                                            | -0.64371400 | 0.86813500  | 0.00000700  |                               |         |         |         |         |         |  |

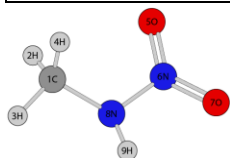

| Geometry – CH <sub>3</sub> NHNO <sub>2</sub> – C <sub>1</sub> |             |             |             | Frequency (cm <sup>-1</sup> ) |         |         |         |         |         |  |
|---------------------------------------------------------------|-------------|-------------|-------------|-------------------------------|---------|---------|---------|---------|---------|--|
| C                                                             | -1.78947900 | 0.01925400  | 0.08368100  | 148.37                        | 188.27  | 316.34  | 536.00  | 607.89  | 765.86  |  |
| H                                                             | -1.93391300 | 0.82414200  | -0.63861800 | 834.82                        | 983.01  | 1143.40 | 1157.60 | 1214.24 | 1408.84 |  |
| H                                                             | -2.59067600 | -0.71274500 | -0.03469100 | 1438.79                       | 1457.35 | 1479.84 | 1505.20 | 1710.47 | 3040.08 |  |
| H                                                             | -1.81840100 | 0.44179700  | 1.09510500  | 3131.84                       | 3165.53 | 3643.31 |         |         |         |  |
| O                                                             | 0.50846800  | 1.25249500  | -0.02682300 |                               |         |         |         |         |         |  |
| N                                                             | 0.60530800  | 0.04838500  | -0.02251100 |                               |         |         |         |         |         |  |
| O                                                             | 1.62479200  | -0.59504200 | 0.08345600  |                               |         |         |         |         |         |  |
| N                                                             | -0.54554800 | -0.66547200 | -0.19383500 |                               |         |         |         |         |         |  |
| H                                                             | -0.40453500 | -1.60873900 | 0.13748000  |                               |         |         |         |         |         |  |



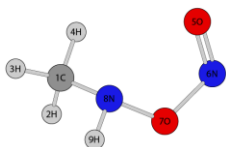

| Geometry – <i>cis</i> -CH <sub>3</sub> NHONO – C <sub>1</sub> |             |             |             | Frequency (cm <sup>-1</sup> ) |         |         |         |         |         |
|---------------------------------------------------------------|-------------|-------------|-------------|-------------------------------|---------|---------|---------|---------|---------|
| C                                                             | 1.64787800  | 0.51534200  | 0.27522800  | 99.40                         | 225.90  | 277.67  | 397.48  | 500.37  | 642.96  |
| H                                                             | 2.01710700  | -0.02654200 | 1.15565100  | 808.99                        | 934.69  | 1002.62 | 1091.33 | 1163.86 | 1230.36 |
| H                                                             | 2.49496400  | 0.84263100  | -0.33444000 | 1430.40                       | 1465.58 | 1485.47 | 1509.53 | 1812.39 | 3025.69 |
| H                                                             | 1.09799400  | 1.40267800  | 0.59917400  | 3113.69                       | 3143.04 | 3562.59 |         |         |         |
| O                                                             | -1.36758800 | 0.83362600  | -0.23198600 |                               |         |         |         |         |         |
| N                                                             | -1.39435900 | -0.20763700 | 0.27691900  |                               |         |         |         |         |         |
| O                                                             | -0.19829900 | -0.91920800 | 0.22350400  |                               |         |         |         |         |         |
| N                                                             | 0.78525100  | -0.29660800 | -0.57240200 |                               |         |         |         |         |         |
| H                                                             | 1.29352100  | -1.09645400 | -0.93551200 |                               |         |         |         |         |         |

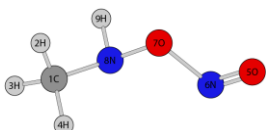

| Geometry – <i>trans</i> -CH <sub>3</sub> NHONO – C <sub>1</sub> |             |             |             | Frequency (cm <sup>-1</sup> ) |         |         |         |         |         |
|-----------------------------------------------------------------|-------------|-------------|-------------|-------------------------------|---------|---------|---------|---------|---------|
| C                                                               | -2.00629600 | -0.46688400 | -0.02544400 | 92.35                         | 187.86  | 214.38  | 385.56  | 452.90  | 624.94  |
| H                                                               | -2.16439900 | -0.72719700 | 1.02951900  | 792.31                        | 946.56  | 1015.86 | 1130.33 | 1174.84 | 1225.96 |
| H                                                               | -2.94178100 | -0.09411400 | -0.45260400 | 1431.43                       | 1464.10 | 1488.71 | 1517.96 | 1842.41 | 3022.96 |
| H                                                               | -1.70916100 | -1.36318500 | -0.57585400 | 3110.84                       | 3142.50 | 3531.47 |         |         |         |
| O                                                               | 2.17806300  | -0.26701300 | 0.08934700  |                               |         |         |         |         |         |
| N                                                               | 1.20081500  | 0.04566500  | -0.44792900 |                               |         |         |         |         |         |
| O                                                               | 0.16117400  | 0.17905000  | 0.48017800  |                               |         |         |         |         |         |
| N                                                               | -0.99760300 | 0.56402000  | -0.21658000 |                               |         |         |         |         |         |
| H                                                               | -1.28326400 | 1.42170600  | 0.24696800  |                               |         |         |         |         |         |

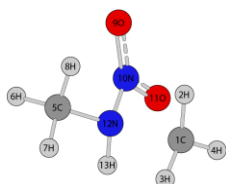

| Geometry – TS4a – C <sub>1</sub> |             |             |             | Frequency (cm <sup>-1</sup> ) |         |         |         |         |         |
|----------------------------------|-------------|-------------|-------------|-------------------------------|---------|---------|---------|---------|---------|
| C                                | -1.39464800 | -1.35183400 | 0.48484900  | -799.99                       |         |         |         |         |         |
| H                                | -1.36296100 | -0.93207400 | 1.48564700  | 86.34                         | 101.52  | 170.07  | 186.68  | 281.53  | 327.93  |
| H                                | -2.36869300 | -1.37476100 | 0.00531200  | 553.84                        | 611.08  | 633.50  | 739.00  | 748.90  | 887.13  |
| H                                | -0.74527700 | -2.20298200 | 0.30576900  | 1000.88                       | 1017.11 | 1144.24 | 1152.23 | 1202.89 | 1319.43 |
| C                                | -1.19467500 | 1.26131200  | -0.30813400 | 1390.54                       | 1408.10 | 1424.71 | 1434.59 | 1461.10 | 1491.48 |
| H                                | -0.69679700 | 2.09422400  | -0.81086800 | 1611.86                       | 3069.22 | 3096.80 | 3160.28 | 3182.22 | 3257.83 |
| H                                | -2.18964600 | 1.09663500  | -0.72572500 | 3258.83                       | 3559.94 |         |         |         |         |
| H                                | -1.26102900 | 1.47052800  | 0.75954600  |                               |         |         |         |         |         |
| O                                | 1.08734100  | 0.79154000  | 0.93082700  |                               |         |         |         |         |         |
| N                                | 0.87315500  | 0.08450000  | -0.05861300 |                               |         |         |         |         |         |
| O                                | 1.59915300  | -0.79664300 | -0.53813200 |                               |         |         |         |         |         |
| N                                | -0.43166100 | 0.02929400  | -0.48438700 |                               |         |         |         |         |         |
| H                                | -0.42206800 | -0.36418500 | -1.42053300 |                               |         |         |         |         |         |

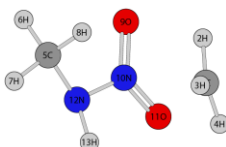

| Geometry – PC4a – C <sub>1</sub> |             |             |             | Frequency (cm <sup>-1</sup> ) |         |         |         |         |         |
|----------------------------------|-------------|-------------|-------------|-------------------------------|---------|---------|---------|---------|---------|
| C                                | -2.42143400 | 0.57135500  | 0.15900800  | 51.25                         | 85.36   | 88.04   | 124.91  | 152.68  | 167.95  |
| H                                | -1.94044000 | 0.33681900  | 1.10074200  | 185.50                        | 212.90  | 321.96  | 534.42  | 591.47  | 609.67  |
| H                                | -2.89006100 | 1.53581100  | 0.01706000  | 767.07                        | 833.40  | 982.78  | 1139.75 | 1159.67 | 1213.23 |
| H                                | -2.52743000 | -0.20147900 | -0.59098300 | 1398.81                       | 1401.53 | 1413.65 | 1441.99 | 1457.31 | 1477.06 |
| C                                | 0.97541900  | 1.60958100  | -0.00606900 | 1499.75                       | 1705.75 | 3040.78 | 3118.82 | 3133.09 | 3168.31 |
| H                                | 1.84465500  | 1.50328000  | 0.64442000  | 3294.35                       | 3304.78 | 3632.66 |         |         |         |
| H                                | 1.17671100  | 2.38535500  | -0.74736200 |                               |         |         |         |         |         |
| H                                | 0.10463600  | 1.89084600  | 0.59887500  |                               |         |         |         |         |         |
| O                                | 0.66964700  | -0.68776900 | 1.18657600  |                               |         |         |         |         |         |
| N                                | 0.40962900  | -0.71570900 | 0.00623500  |                               |         |         |         |         |         |
| O                                | -0.10307900 | -1.63171900 | -0.59677900 |                               |         |         |         |         |         |
| N                                | 0.75886300  | 0.37650100  | -0.73291300 |                               |         |         |         |         |         |
| H                                | 0.19602300  | 0.39411900  | -1.57201400 |                               |         |         |         |         |         |

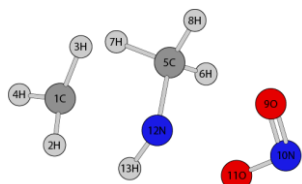

| Geometry – TS4b – C <sub>1</sub> |             |             |             | Frequency (cm <sup>-1</sup> ) |         |         |         |         |         |
|----------------------------------|-------------|-------------|-------------|-------------------------------|---------|---------|---------|---------|---------|
| C                                | -2.28911600 | -0.92070400 | -0.12940900 | -969.40                       |         |         |         |         |         |
| H                                | -2.11127800 | -1.71561600 | -0.84287700 | 75.34                         | 121.38  | 155.67  | 183.40  | 214.25  | 304.97  |
| H                                | -2.13801700 | -1.16250600 | 0.91598500  | 373.66                        | 387.36  | 455.94  | 567.14  | 620.00  | 883.73  |
| H                                | -3.08048300 | -0.21439600 | -0.36376500 | 914.50                        | 962.04  | 1002.63 | 1044.65 | 1131.04 | 1252.51 |
| C                                | -0.71883600 | 1.20146600  | 0.68726800  | 1343.60                       | 1408.09 | 1417.32 | 1421.77 | 1473.21 | 1492.48 |
| H                                | -0.10779200 | 2.09321000  | 0.52098900  | 1701.92                       | 3048.80 | 3106.26 | 3131.76 | 3147.76 | 3267.19 |
| H                                | -1.76897900 | 1.50009700  | 0.75285900  | 3287.63                       | 3526.12 |         |         |         |         |
| H                                | -0.42312700 | 0.72259600  | 1.62331700  |                               |         |         |         |         |         |
| O                                | 1.41168700  | -0.85631800 | 0.76733500  |                               |         |         |         |         |         |
| N                                | 1.85515200  | -0.27533500 | -0.15902100 |                               |         |         |         |         |         |
| O                                | 1.01959700  | 0.45036500  | -0.85730400 |                               |         |         |         |         |         |
| N                                | -0.55182500 | 0.23140300  | -0.40698100 |                               |         |         |         |         |         |
| H                                | -0.89616700 | 0.64719500  | -1.27189300 |                               |         |         |         |         |         |

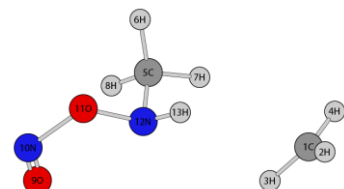

| Geometry – PC4b – C <sub>1</sub> |             |             |             | Frequency (cm <sup>-1</sup> ) |         |         |         |         |         |
|----------------------------------|-------------|-------------|-------------|-------------------------------|---------|---------|---------|---------|---------|
| C                                | -3.42514400 | -0.63201700 | 0.19468200  | 17.55                         | 61.14   | 89.98   | 98.27   | 112.61  | 119.21  |
| H                                | -3.69350500 | -1.34403000 | -0.57415200 | 208.78                        | 219.99  | 282.38  | 404.74  | 502.58  | 583.31  |
| H                                | -2.63689600 | -0.86816700 | 0.89813300  | 656.35                        | 814.25  | 943.90  | 1004.06 | 1090.62 | 1164.48 |
| H                                | -4.01064000 | 0.26927500  | 0.31609200  | 1231.54                       | 1406.25 | 1410.09 | 1426.38 | 1464.99 | 1481.38 |
| C                                | -0.43506800 | 1.39208800  | 0.12179000  | 1506.19                       | 1809.84 | 3023.97 | 3111.27 | 3123.15 | 3140.97 |
| H                                | -0.33390000 | 2.04562800  | -0.75435300 | 3303.32                       | 3304.82 | 3545.28 |         |         |         |
| H                                | -1.44697100 | 1.48377400  | 0.52794600  |                               |         |         |         |         |         |
| H                                | 0.27670700  | 1.70119200  | 0.89158100  |                               |         |         |         |         |         |
| O                                | 1.90419900  | -0.39656200 | 0.97325400  |                               |         |         |         |         |         |
| N                                | 2.08013600  | -0.43276600 | -0.17290300 |                               |         |         |         |         |         |
| O                                | 0.96164100  | -0.15108700 | -0.94814800 |                               |         |         |         |         |         |
| N                                | -0.22163200 | -0.01426600 | -0.19271300 |                               |         |         |         |         |         |
| H                                | -0.92978000 | -0.33768300 | -0.84562000 |                               |         |         |         |         |         |

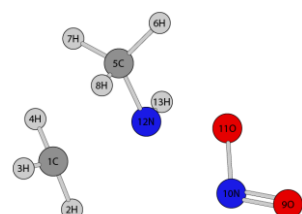

| Geometry – TS4c – C <sub>1</sub> |             |             |             | Frequency (cm <sup>-1</sup> ) |         |         |         |         |         |  |
|----------------------------------|-------------|-------------|-------------|-------------------------------|---------|---------|---------|---------|---------|--|
| C                                | -2.33402400 | -1.16404400 | 0.09055200  | -986.66                       |         |         |         |         |         |  |
| H                                | -1.93082300 | -2.12127500 | -0.21730700 | 21.82                         | 119.34  | 149.17  | 159.58  | 182.82  | 271.16  |  |
| H                                | -2.42069400 | -1.00312200 | 1.15932700  | 376.74                        | 396.80  | 412.83  | 601.19  | 651.22  | 782.34  |  |
| H                                | -3.12665000 | -0.74833700 | -0.52644900 | 951.38                        | 984.21  | 1006.22 | 1057.43 | 1136.18 | 1254.63 |  |
| C                                | -1.20317300 | 1.32199600  | 0.31411900  | 1339.02                       | 1411.09 | 1420.92 | 1425.74 | 1473.91 | 1486.17 |  |
| H                                | -0.70100400 | 2.18945100  | -0.12256000 | 1766.40                       | 3049.17 | 3098.04 | 3138.75 | 3141.04 | 3255.95 |  |
| H                                | -2.28322500 | 1.42461100  | 0.17915100  | 3279.58                       | 3528.82 |         |         |         |         |  |
| H                                | -0.98202600 | 1.27606000  | 1.38382800  |                               |         |         |         |         |         |  |
| O                                | 2.67293900  | -0.32491900 | 0.18072200  |                               |         |         |         |         |         |  |
| N                                | 1.51087500  | -0.47057900 | 0.25947700  |                               |         |         |         |         |         |  |
| O                                | 0.85240600  | 0.41370200  | -0.51026100 |                               |         |         |         |         |         |  |
| N                                | -0.73764500 | 0.07408200  | -0.30843200 |                               |         |         |         |         |         |  |
| H                                | -0.94776500 | 0.10011900  | -1.30502300 |                               |         |         |         |         |         |  |

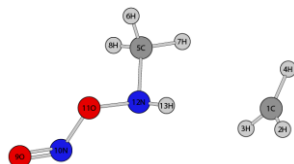

| Geometry – PC4c – C <sub>1</sub> |             |             |             | Frequency (cm <sup>-1</sup> ) |         |         |         |         |         |  |
|----------------------------------|-------------|-------------|-------------|-------------------------------|---------|---------|---------|---------|---------|--|
| C                                | 3.49580700  | -0.92483900 | -0.05015400 | 38.66                         | 44.73   | 82.38   | 92.42   | 98.27   | 103.29  |  |
| H                                | 3.55822800  | -1.78215000 | 0.60637200  | 191.76                        | 206.43  | 232.50  | 391.74  | 455.45  | 579.43  |  |
| H                                | 2.83595000  | -0.94889200 | -0.90796100 | 629.34                        | 807.93  | 965.73  | 1015.29 | 1131.09 | 1177.81 |  |
| H                                | 4.16418800  | -0.08759500 | 0.09864800  | 1231.58                       | 1405.07 | 1408.47 | 1429.94 | 1466.31 | 1489.97 |  |
| C                                | 0.81285100  | 1.50277400  | -0.09629300 | 1517.54                       | 1839.46 | 3021.58 | 3108.23 | 3123.21 | 3140.08 |  |
| H                                | 0.70266100  | 2.02250700  | 0.86465900  | 3300.66                       | 3307.96 | 3523.86 |         |         |         |  |
| H                                | 1.86832200  | 1.49716900  | -0.38507000 |                               |         |         |         |         |         |  |
| H                                | 0.24411400  | 2.03659800  | -0.86209100 |                               |         |         |         |         |         |  |
| O                                | -2.86473400 | -0.50985300 | 0.00689100  |                               |         |         |         |         |         |  |
| N                                | -1.79118200 | -0.45886200 | -0.42660600 |                               |         |         |         |         |         |  |
| O                                | -0.91455400 | 0.08344000  | 0.51734300  |                               |         |         |         |         |         |  |
| N                                | 0.37150000  | 0.11740100  | -0.05011700 |                               |         |         |         |         |         |  |
| H                                | 0.94666400  | -0.40371300 | 0.60731600  |                               |         |         |         |         |         |  |

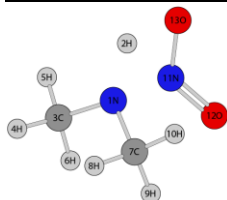

| Geometry – TS5 – C <sub>1</sub> |             |             |             | Frequency (cm <sup>-1</sup> ) |         |         |         |         |         |  |
|---------------------------------|-------------|-------------|-------------|-------------------------------|---------|---------|---------|---------|---------|--|
| C                               | 0.58913200  | 0.14637100  | -0.31904200 | -1657.38                      |         |         |         |         |         |  |
| H                               | -0.16946800 | 0.65714800  | -1.17072400 | 95.52                         | 191.37  | 217.13  | 265.98  | 286.98  | 350.97  |  |
| H                               | 1.52887900  | 0.91729300  | 0.48139000  | 468.34                        | 651.96  | 701.40  | 730.08  | 984.30  | 1044.23 |  |
| H                               | 2.50346200  | 0.92361900  | -0.01463200 | 1072.33                       | 1097.97 | 1204.90 | 1214.98 | 1270.06 | 1386.69 |  |
| C                               | 1.15930600  | 1.93992500  | 0.58062300  | 1418.67                       | 1441.98 | 1461.19 | 1469.45 | 1480.00 | 1491.26 |  |
| H                               | 1.62874000  | 0.46473800  | 1.47504300  | 1507.69                       | 2195.63 | 3039.93 | 3044.55 | 3126.61 | 3132.15 |  |
| H                               | 0.95711000  | -1.25141800 | -0.49161000 | 3156.03                       | 3157.46 |         |         |         |         |  |
| H                               | 1.94401600  | -1.30501000 | -0.95840100 |                               |         |         |         |         |         |  |
| O                               | 0.97303200  | -1.74812800 | 0.48528000  |                               |         |         |         |         |         |  |
| N                               | 0.21345600  | -1.73772900 | -1.12729500 |                               |         |         |         |         |         |  |
| O                               | -0.83867600 | 0.23926900  | 0.28453200  |                               |         |         |         |         |         |  |
| N                               | -1.25831200 | -0.67341400 | 0.97292900  |                               |         |         |         |         |         |  |
| H                               | -1.41939700 | 0.68725200  | -0.84380500 |                               |         |         |         |         |         |  |

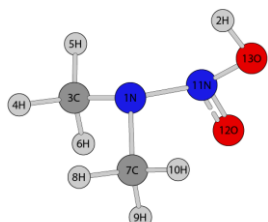

| Geometry – Product-5 – C <sub>1</sub> |             |             |             | Frequency (cm <sup>-1</sup> ) |         |         |         |         |         |
|---------------------------------------|-------------|-------------|-------------|-------------------------------|---------|---------|---------|---------|---------|
| C                                     | -0.56197700 | 0.22897100  | -0.43835100 | 94.67                         | 221.91  | 248.84  | 287.87  | 296.44  | 337.62  |
| H                                     | 1.45338700  | 0.64895700  | -1.45377200 | 374.00                        | 522.50  | 609.67  | 668.15  | 790.30  | 952.73  |
| H                                     | -1.58657500 | -0.80716600 | -0.42481000 | 1045.40                       | 1075.84 | 1105.18 | 1196.91 | 1241.05 | 1269.33 |
| H                                     | -2.52937300 | -0.34767400 | -0.73161200 | 1320.48                       | 1415.66 | 1440.66 | 1461.72 | 1475.99 | 1481.91 |
| C                                     | -1.32214600 | -1.58991200 | -1.13977800 | 1499.85                       | 1546.98 | 3014.51 | 3016.48 | 3113.20 | 3113.86 |
| H                                     | -1.70535700 | -1.25128100 | 0.57402600  | 3150.78                       | 3152.07 | 3845.65 |         |         |         |
| H                                     | -0.85005700 | 1.28031500  | 0.53994200  |                               |         |         |         |         |         |
| H                                     | -1.75968400 | 1.79635800  | 0.22315800  |                               |         |         |         |         |         |
| O                                     | -0.99342600 | 0.86155000  | 1.54654100  |                               |         |         |         |         |         |
| N                                     | -0.02207400 | 1.99313300  | 0.55626600  |                               |         |         |         |         |         |
| O                                     | 0.68108400  | -0.38652500 | -0.10440700 |                               |         |         |         |         |         |
| N                                     | 0.85760800  | -0.89735600 | 0.99932900  |                               |         |         |         |         |         |
| H                                     | 1.72548100  | 0.41646200  | -0.55761900 |                               |         |         |         |         |         |

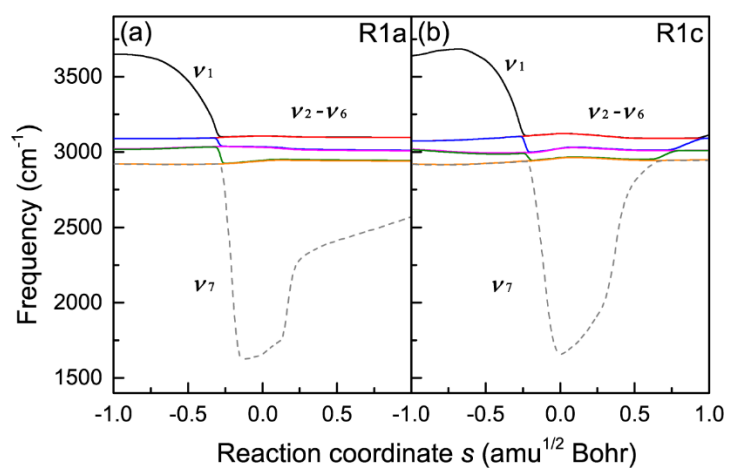

Figure S1. Seven highest vibrational frequencies of general TSs along the reaction coordinate for (a) R1a and (b) R1c.
